# Supplementary material for: Progress and challenges in predicting protein methylation sites
Source: Royal Society of Chemistry journal article supplement (doi:10.1039/c5mb00259a), 2015-06-03
Supplement: c5mb00259a1.pdf [file c5mb00259a1.pdf]

## Supplementary materials

### Progresses and challenges in predicting protein methylation sites

Shao-Ping Shi<sup>a,b</sup>, Hao-Dong Xu<sup>a</sup>, Ping-Ping Wen<sup>a</sup>, Jian-Ding Qiu<sup>a,\*</sup>

<sup>a</sup> Department of Chemistry, Nanchang University, Nanchang, 330031, China

<sup>b</sup> Department of Mathematics, Nanchang University, Nanchang, 330031, China

\*Corresponding Author: Jian-Ding Qiu, Department of Chemistry, Nanchang University, Nanchang 330031, China. Tel: + 86 791 83969518, e-mail: jdqiu@ncu.edu.cn

#### Testing dataset:

**50 proteins with 155 methylated arginine sites.**

**50 proteins with 52 methylated lysine sites.**

**Table S1. Comparison of the predictive result in different methylarginine predictors with a testing dataset.**

**Table S2. Comparison of the predictive result in different methyllysine predictors with a testing dataset.**

## Testing dataset:

### 50 proteins with 155 methylated arginine sites:

>sp|043823|AKAP8\_HUMAN A-kinase anchor protein 8 OS=Homo sapiens GN=AKAP8 PE=1 SV=1 Site of Methylarginine:188, 190, 194, 233, 277

MDQGYGGYGAWASAGPANTQGAYGTGVASWQGYENYNYYGAQNTSVTTGATYSYGPASWEA  
AKANDGGLAAGAPAMHMASYGPEPCTDNSDSLIAKINQRLDMSKEGGRGSGGGGEGIQ  
DRESSFRFQPFESYDSRPLPEHNPYRPSYSYDYEFDLGSDRNGSFGGQYSECRDPARER  
GSLDGFMRGRGQGRFQDRSNPOTFMRSDPFVPPAASSEPLSTPWNELNYVGGRLGGPSP  
SRPPSFLSQSMADPYGVMGMQAGGYDSTMPYGCGRSQPRMRDRDRPKRRGFDRFGPDG  
TGRKRKQFQLYEEDTKLARVDSEGDFSENDDAAGDFRSGDEEFKGEDELCDSGRQRGEK  
EDEDEDVKKRREKQRRDRTRDRAADRIQFACSVCKFRSFDDEEIQKHLQSKFHKETLRF  
ISTKLPDKTVEFLQEYIVNRNKKIEKRRQELMEKETAKPKPDPFKGIGQEHFFKKIEAAH  
CLACDMLIPAQPQLQRHLHSVHNRRLAAEQFKKTSLVAKSVLNNRHIVKMLEKYL  
KGEDPFTSETVDPMEGDDNLGGEDKKETPEEVAADVLAEVITAAVRAVDGEGAPAPESS  
GEPAEDEGPTDTAEAGSDPQAEQLLEEQVPCGTAHEKGVPKARSEAAEAGNGAETMAAEA  
ESAQTRVAPAPAAADA EVEQTDAESKDAVPTE

>sp|Q9ULX6|AKP8L\_HUMAN A-kinase anchor protein 8-like OS=Homo sapiens GN=AKAP8L PE=1 SV=3 Site of Methylarginine:171, 179, 185, 208, 217, 247

MSYTGfVQGSETTLQSTYSDTSAQPTCDYGYGTWNSGTNRGYEGYGYGYGQDNTTNYG  
YGMATSHSWEMPSSDTNANTSASGSASADSVLSRINQRLDMVPHLETMMQGGVYSGGGE  
RYDSYESCDSRAVLSELDYRSGDYSELDPMEMAYEGQYDAYRDQFRMRGNDTFGPRA  
QWARDARSGRPMASGYGRMWEDPMGARGQCMGASRLPSLFSQNI IPEYGMFQGMRRGGG  
AFPGGSRFGFGNGMKQMRRTWKTWTTADFRTKKKKRQGGSPDEPDSKATRTDCSDNS  
DSDNDEGTEGEATEGLEGEAVEKGSRVGDEDEEGKEDGREGKEDPEKGALTTQDENGQ  
TKRKLQAGKKSQDKQKQRDRMVERIQFVCSLCKYRTFYEDEMASHLDSKFHKEHFYV  
GTKLPKQTADFLQYVYVTKKTEELRKTVEDLDGLIHQIYRDQDLTQE IAMEHFVKKVE  
AAHCAACDLFIPMQFGIIQKHLKTMHNRNRRLMMEQSKKSSLMVARSILNNKLSKKLE  
RYLKGENPFTDSPEEKEQEEAEGGALDEGAQGEAAGISEGAEGVPAQPPVPEPAPGAV  
SPPPPPPEEEEEGAVPLLGGALQRQIRGIPGLDVEDDEEGGGGAP

>sp|075815|BCAR3\_HUMAN Breast cancer anti-estrogen resistance protein 3 OS=Homo sapiens GN=BCAR3 PE=1 SV=1 Site of Methylarginine:442

MAAGKFASLPRNMPVNHQFPLASSMDLLSSRSPLAEHRPDAYQDVS IHGTLPRKKKGGPP  
IRSCDDFSHMGTLPKSKSPRQNSPVTQDGIQESPWQDRHGETFTFRDPHLLDPTVEYVKF  
SKERHIMDRTPKLLKELEELLSSEDLRSHAWYHGRIPRQVSENLVQRDGDVLRDSL  
SSPGNFVLTQWKNLAQHFKINRTVLRLESEYSRVQYQFEMESFDSIPGLVRCYVGNRRP  
ISQQSGAIIQPINRTVPLRCLLEHYGTSPGQAREGSLTKGRPDVAKRSLTMGGVQARE  
QNLPRGNLLRNKEKSGSQPAQLDHMQDRRALSLSKAHQSESYLPIGCKLPPQSSGVDTSPC  
PNSPVFRTGSEPALSPAVRRVSSDARAGEALRGSDSQCPCPKPPKCKVPFLKVPSSPS  
AWLNSEANYCELNPAFATGCGRGAKLPSCAQGSHTELLTAKQNEAPGPRNSGVNYLILDD  
DDRERWPPEAAAQMEKGQWQDKGEFVTPLLETVSSFRPNEFESKFLPPENKPLETAMLKRA  
KELFTNNDPKVIAQHVLSDMCRVARILGVSEEMRRNMGVSSGLELITLPHGHQLRLDIE  
RHNTMAIGIAVDILGCTGTLEDRAATLSKIIQVAVELKDSMGDLYSFSALMKALEMPQIT  
RLEKTWTALRHQYQTAILYEKQLKPFKSKLLHEGRESTCVPPNNVSVPLLMPLVTLMERQ

AVTFEGTDMWEKNDQSCSEIMLNHLATARFMAEAADSYRMAERILAGFQPDEEMNEICKT  
EFQMRLWGSKGAQVNVQTERYEKFNQILTALSRKLEPPPVKQAEI

>sp|Q6XZF7|DNMBP\_HUMAN Dynamin-binding protein OS=Homo sapiens GN=DNMBP PE=1  
SV=1 Site of Methylarginine:480, 488

MEAGSVVRAIFDFCPSVSEELPLFVGDIEVLAVVDEFWLLGKKEDVTGQFPSSFVEIVT  
IPSLKEGERLFVCI CEFTSQELDNLPLHRGDLVILDGIPTAGWLQGRSCWGARGFFPSSC  
VRELCLSSQSRQWHSQSALFQIPEYSMGQARALMGLSAQLDEELDFREGDVITIIIGVPEP  
GWFEGELEGRRGIFPEGFVELLGPLRTVDESVSNGQDDCIVNGEVDTPVGEIEIGPDED  
EEEPGTYGVALYRFQALEPNELDFEVGDKIRILATLEDGWLEGLKGRGTGIFPYRFVKLC  
PDTRVEETMALPQEGSLARIPETSLDCLENTLGVVEQRHETSDEAEPEPDCIIEAPTSP  
LGHLTSEYDTRNSYQDEDTAGPPRSPGVWEMPLATDSPTSDPTEVVNGISSQPQVPF  
HPNLQKSQYYSTVGGSHPHSEQYDPLLEARTDYASLPKRMYSQKTLQKPVLPYR  
GSSVSASRVVKPRQSSPQLHNLASYTKKHHTSSVYSISERLEMKPGPQAQGLVMEATHS  
QGDGSTDLDLQQLIEFEKSLAGPGTEPKILRHFSIMDFNSEKDIVRGSSKLITEQE  
LPERRKALRPPPPRPTVSTSPHLLVDQNLKPAPPLVVRPSRPAPLPPSAQQRNAVSP  
KLLSRHRPTCETLEKEGPGHMRSLDQTSPCPLVLRVIEEMERLDMYSRAQEELNMLE  
EKQDESSRAETLEDLKFCESNIESLNMELQQLREMTLLSSQSSSLVAPSGSVSAENPEQR  
MLEKRAKVI EELLQTERDYIRDLEMCIERIMVPMQQAQVFNIDFEGFLGNMQMVIKVSQK  
LLAALEISDAVGPVFLGHRDELEGTYKIYCQNHDEAIALLEIYEKDEKIQKHLQDSLADL  
KSLYNEWGCTNYINLGSFLIKPVQRMRYPLLLMELLNSTPESHDPKVPLTNAVLAVKIEI  
NVNINEYKRRKDLVLKYRKGDEDSLMEKISKLNHSIIKKSNRVSSHLLKHLTGFAPQIKD  
EVFEETEKNFRMQRERLIKSFIRDLSLYLQHIREACVKVVAASVMWDVCMERGHRLDLEQF  
ERVHRYISDQLFTNFKERTERLVISPLNQLLSMFTGPHKLVQKRFKLLDFYNCTERA EK  
LKDKKTLEELQSARNNYEALNAQLDELKPFHQYAQGLFTNCVHGYAEAHCDFVHQALEQ  
LKPLLSLLKVAGREGNLIAIFHEEHSRVLQQLQVFTFFPESLPATKKPFERKTIDRQSAR  
KPLGLPSYMLQSEELRASLLARYPPEKLFQAERNFNAQDLDVSLLEGDLVGVIKKKDP  
MGSQNRWLIDNGVTKGFVYSSFLKPYNPRRSHSDASVGSHTSEHGSPPRFRQNSG  
STLTFNPSSMAVSFTSGSCQKQPQDASPPPKECDQGTLSASLNPSNSESSPSRCPSPDS  
TSQPRSGSDADVARDVKQPTATPRSYRNRHPEIVGYVPGRNGQSQDLVKGCARTAQAP  
EDRSTPEPDGSEAEGNQVYFAVYTFKARNPNELSVSANQKLIKLEFKDVTGNTEWVLAEVN  
GKKGYVPSNYIRKTEYT

>sp|Q9Y4H2|IRS2\_HUMAN Insulin receptor substrate 2 OS=Homo sapiens GN=IRS2 PE=1  
SV=2 Site of Methylarginine:412, 429

MASPPRHGPPGPASGDGPNLNNNNNNHNSVRKCGYLKQKQKHGKRRFFVLRGPGAGGDEA  
TAGGGSAPQPPRLEYESEKKWRSKAGAPKRVIALDCCLNINKRADAKHKYLIALYTKDE  
YFAVAANEQE QEGWYRALTDLVSEGRAAGDAPPAAPAAASCSASLPGALGGSAGAAGA  
EDSYGLVAPATAAYREVWQVNLKPKGLGQSKNLTG VYRLCLSARTIGFVKLNCEQPSVTL  
QLMNIRRCGHSDSFFFI EVGRSAVTGPGELWMQADDSVVAQNIHETILEAMKALKELFEF  
RPRSKSQSSGSSATHPI SVPGARRHHHLVNLPPSQTGLVRRSRTDSLAATPPAAKCSSCR  
VRTASEGDGGAAGAAAAGARPVSVAGSPLSPGPVVRAPLSRSHTLSGGCGGRGSKVALLP  
AGGALQHSRSMMPVAHSPAATSPGSLSSSSGHGSGSYPPPPGPHPLPHPLHHGPGQR  
PSSGSASASGSPDPGFMSLDEYGSPPDLRAFCSHRSNTPEIAETPPARDGGGGGEFY  
GYMTMDRPLSHCGRSYRRVSGDAAQDLDRGLRKRYSLTTPARQRPVPQPSASLDEYTL  
MRATFSGSAGRLCPSPASSPKVAYHPYEDYGDIEIGSHRSSSSNLGADDGYMPMPGA

ALAGSGSGSCRSDDYMPMPSPASVSAPKQILQPRAAAAAAAAAVPSAGPAGPAPTSAAAGRTF  
PASGGGYKASSPAESSPEDSGYMRMWCCKLSMEHADGKLLPNGDYLNVSPSDAVTTGTP  
PDFSFAALHPGGEPLRGVPGCCYSSLPRSYKAPYTCGGSDQYVLMSSPVGRILEEERLE  
PQATPGPSQAASAFGAGPTQPPHPVVPSPVPSGGRPEGFLGQRGRAVRPTRLSSLEGLPS  
LPSMHEYPLPPEPKSPGEYINIDFGEPGARLSPPAPPLLASAASSSSLLSASSPASSLGS  
GTPGTSSDSRQRSPLSDYMNLDFFSSPKSPKPGAPSGHPVGSGLDGLLSPEASSPYPLPPR  
PSASPSSSLQPPPPPPAPGELYRPPASAVATAQGPAAASSLSSDTGDNGDYTEMAFGVA  
ATPPQPIAAPPKPEARVASPTSGVKRLSLMEQVSGVEAFLQASQPPDPHRGAKVIRADP  
QGGRRRHSSSETFSSSTTTVTPVSPSFAHNPKRHNSASVENVSLRKSSEGGVGVGPGGGDEP  
PTSPRQLQAPPLAPQGRPWTPGQPGGLVGCPSGGSPMRRETSAGFQNLNYIAIDVRE  
EPGLPPQPQPPPPPLQPGDKSSWGRTRSLGGLISAVGVGSTGGGCGPGPGALPPANTY  
ASIDFLSHHLKEATIVKE

>sp|Q15654|TRIP6\_HUMAN Thyroid receptor-interacting protein 6 OS=Homo sapiens  
GN=TRIP6 PE=1 SV=3 Site of Methylarginine:25, 111, 179, 205, 217, 236, 238

MSGPTWLPPKQPEPARAPQGRAIPRGTPGPPPAHGAALQPHPRVNFCLPSEQCYQAPGG  
PEDRGPAAVWVSHGVLQHTQGLPADRGGLRPGSLDAEIDLLSSTLAELNGGRGHASRRPDR  
QAYEPPPPPAYRTGSLKPNPASPLPASPYGGPTPASYTTASTPAGPAFPVQVKAQPVVRG  
CGPPRRGASQASGPLPGPHFPLPGRGEVWGPYRSQREPGPAKEEAAGVSGPAGRGRGG  
EHGPQVPLSQPPEDELDRITKLVHDMNHPPSGEYFGQCGGCGEDVVDGAGVVALDRVF  
HVGCFVCSTCRAQLRGQHFYAVERRAYCEGCYVATLEKCATCSQPILDRILRAMGKAYHP  
GCFTCVVCHRGLDGIPTVDATSIHCIEDFHRKFAPRCSVCGGAIMPEPGQEETVRIVA  
LDRSFHIGCYKCEECGLLSSEGECCGCYPLDGHILCKACSAWRIQELSATVTTDC

>sp|Q8TF74|WIPF2\_HUMAN WAS/WASL-interacting protein family member 2 OS=Homo  
sapiens GN=WIPF2 PE=1 SV=1 Site of Methylarginine:37, 356, 430

MPIPPPPPPPGPPPPPTFHQANTEQPKLSRDEQRGRGALLQDICKGTKLKKVTNINDRS  
APILEPKKSSGGYGSAGALQPKGGLFQGGVLLKLRPVGAKDGSENLAGKPALQIPSSRA  
AAPRPPVSAASGRPQDDTSSRASLPDLSRPNTTSSGTMKSSSAPPPP  
PPGRRANAPPTPLMHSSKAPAYNREKPLPPTPGQLHPGREGPPAPPVKKPPSPVNIR  
TGPSGQSLAPPPPYRQPPGVPNGPSSPTNESAPQLRHNLSLHRKTPGPVRLAPPPT  
SASPSLLSNRPPPARPPSRGAAPPPPPVIRNGARDAPPPPPYRMHSEPPSRGKPP  
PPPSRTPAGPPPPPPPLRNGHRDSITTVRSFLDDFESKYSFHPVEDFPAPEEYKHFQRI  
YPSKTNRARAGAPPLPILR

>sp|Q99959|PKP2\_HUMAN Plakophilin-2 OS=Homo sapiens GN=PKP2 PE=1 SV=2 Site of  
Methylarginine:46, 125

MAAPGAPAEYGYIRTVLGGQILGQLDSSSLALPSEAKLKLGGSSGRGGQTVKSLRIQEQV  
QQTLARKGRSSVGNLHRTSSVPEYVYNLHLVENDFVGRSPVPKTYDMLKAGTTATYE  
GRWGRGTAQYSSQKVEERSLRHPLRRLLEISPDSSPERAHYTHSDYQYSQRSQAGHTLHH  
QESRAALLVPPRYARSEIVGVSRAQTTSRQRHFDYHRQYQHGSVSDTVFDSIPANPAL  
LTYPRPGTSRSMGNLLEKENYLTAGLTVGQVRPLVPLQVPTQNRASRSSHQSSFHSTRT  
LREAGPSVAVDSSGRRHLTVGQAAAGSGNLLTERSTFTDSQLGNADMEMTLERAVSML  
EADHMLPSRISAAATFIQHECFQKSEARKRVNQLRGILKLLQLLVQKQVEDVQRAVCGALR  
NLVFEDNDNKLEVAELNGVPRLLQVLKQTRDLETKKQITDHTVNLRSRNGWPGAVAHACN  
PSTLGGQGGRI TRSGVRDQPDQHGLLWNLSSNDKLNLMITEALLTLTENIIPFSGWPE  
GDYPKANGLLDFDIFYNVTGCLRNMSSAGADGRKAMRRCDGLIDSLVHYVRGTIADYQPD

DKATENCVCILHNL SYQLEAELPEKYSQNIYIQNRNIQTDNNSIGCFGSRSRKVKEQYQ  
DVPMPPEEKS NPKGV EWLWHSIVIRMYLSLIAKSVRNYTQEASLGALQNLTAGSGPMPTSV  
AQTVVQKESGLQHTRKMLHVGDP SVKKT AISLLRNLSRNLSLQNEIAKETLPDLVSIIPD  
TVPSTDLLIETTASACYTLNNI IQNSYQNARDLLNTGGIQKIM AISAGDAYASNKASKAA  
SVLLYSLWAHTELHHAYKKAQFKKTD FVNSRTAKAYHSLKD

>sp|Q9UKV3|ACINU\_HUMAN Apoptotic chromatin condensation inducer in the nucleus  
OS=Homo sapiens GN=ACIN1 PE=1 SV=2 Site of Methylarginine:8, 14, 29

MWRRKHPRTSGGTRGVLSG NRGVEYSGRGLGT FEGRWKLPKMPEAVGTD PSTRKMA  
ELEEVTLDGKPLQALRVTDLKAAL EQRGLAKSGQSALVKRLKGALML ENLQKHSTPHAA  
FQPNQIGEMSQNSFIKQYLEKQQELLRQRLE REAREAAELEEASAESEDEMIHPEGVA  
SLLPPDFQSSLERPELELSRHSPR KSSSISEEKGDS DDEKPRKGERRSSRVQARA AKLS  
EGSQPAEEEDQETPSRNLRVRAD RNLT EEEEEEEEEEDDEEEEGDDEGQKSREAPI  
LKEFKEEGEEIPRVKPEEMMDERPKTR SQEQEVLERGGRFTRSQEEARKSHLARQQEKE  
MKTTSPL EEEEREIKSSQGLKEKSKSPSP PRLTEDRKKASLVALPEQTASEEETPPPLLT  
KEASSPPHPQLHSEEEIEPMEGPAPA VLIQLSPPNTDADTRELLVSQHTVQLVGGLSPL  
SSPSDTKAESPAEKVPEESVLPVQKSTLADYSAQKDLEPESDRSAQPLPLKIEELALAK  
GITEECKQPSLEKQEGRRASH TLLPSHRLKQSADSSSRSSSSSSSSSRSRSPDSSG  
SRSHSPLRSKQRDVAQARTHANPRGRPKMGRSTSESRSRSRSRSASSNSRKSLSPGV  
SRDSSTSYTETKDPSSGQEVATPPVPQLVCEPKERTSTSSSSVQARRLSQPESA EKHVT  
QRLQPERGSPKKCEAAEAEPAAATQPQTSETQTS HLPESERIHHTVEEKEEVTMDTSEN  
PENDVPEPPMPIADQVSNDDRPEGSVEDEEKKESL PKSFKRKISVVSATKGV PAGNSDT  
EGGQPGRRRWGASTATTQKKPSISITTESL KSLIPDIKPLAGQEAVVDLHADD SRISED  
ETERNGDDGTHDKGLKICRTVTQV VPAEGQENGQRE EEEEEKEPEAEPVPPQVSVEVAL  
PPPAEHEVKKVTLGDTL TRRSISQQKSGV SITIDDPVRTAQVPSPPRGKISNIVHISNLV  
RPFTLGQLKELLGRTGTLVEEAFWIDKIKSHCFV TYSTVEEAVATRTALHG VKWPQSNPK  
FLCADYAEQDEL DYHRLLVDRPSETKTEE QGIPRPLHPPPPVQPPQHPRAEQREQER  
AVREQWAEREREMERRERTRSEREWDRDKVREGPRSRSRDRRRKERAKSKEKKSEKKE  
KAQEPPAKLLDDLFRKTKAAPCIYWLPLTDSQIVQKEAERAERAKEREKRRKEEEEEQ  
KEREKAERERNRQLEREKRREHSRERDRERERERERDRGDRDRDRERDRERDRDRD  
TKRHSRSRSTPVRDRGGR

>sp|Q9BZZ5|API5\_HUMAN Apoptosis inhibitor 5 OS=Homo sapiens GN=API5 PE=1 SV=3  
Site of Methylarginine:500, 504, 507, 510

MPTVEELYRNYGILADATEQVGGHKDAYQV ILDGVKGGTKEKRLAAQFIPKFFKHFP ELA  
DSAINAQLDLCEDEDVSIRRQAIKELPQFATGENLPRVADILTQLLQTDDSAEFNLV NNA  
LLSIFKMDAKGTLGGLFSQILQGEDIVRERAIKFLSTKLTLPDEVLTK EVEELILTESK  
KVLEDVTGEEFVLFMKILSGLKSLQTVSGRQQLV ELVAEQADLEQTFNPSDPDCVDRLLQ  
CTRQAVPLFSKNVHSTRFVYFCEQVLPNLGTLTPVEGLDIQLEVLKLLAEMSSFCGDM  
EKLETNLRKLFDKLLEYMPLPPEEAENGENAGNEEPKLF SYVECLLYSFHQLGRKLPDF  
LTAKLNAEKLKDFKIRLQYFARGLQVYIRQLRLALQGKTGEALKTEENKIKVVALKITNN  
INVLKDLFHIPPYSYKSTVTL SWKPVQKVEIGQKRASEDTTSGSPPKSSAGPKRDARQI  
YNPSPGKYSSNLGNFNYEQRGAFRGSRGGRGWGTRGNRSRGRLY

>sp|Q9NQS1|AVEN\_HUMAN Cell death regulator Aven OS=Homo sapiens GN=AVEN PE=1  
SV=1 Site of Methylarginine:28, 37, 50

MQAERGARGGRPRGRPGDRHSERPGAAA AVARGGGGGGGGGGRRGRGRGRGRFR

GARGGRGGGAPGRSRREPGGWGAGASAPVEDDSAETYGEENDEQGNYSKRKIVSNWDR  
YQDIEKEVNNESGESQRGTDFSVLLSSAGDSFSQFRFAEEKEWDSEASCPKQNSAFYVDS  
ELLVRALQELPLCLRLNVAELVQGTVPLEVPQVKPKRTDDGKGLGMQLKGPLPGGRGP  
IFELKSVAAGCPVLLGKDNPSPGSRDSQKPTSPLQSAGDHLEELDLLLNLDAPIKEGD  
NILPDQTSQDLKSKEDGEVVQEEEVCAKPSVTEEKNMEPEQPSTSKNVTEEELEDWLDSM  
IS

>sp|095817|BAG3\_HUMAN BAG family molecular chaperone regulator 3 OS=Homo  
sapiens GN=BAG3 PE=1 SV=3 Site of Methylarginine:121,261

MSAATHSPMMQVASNGDRDPLPPGWEIKIDPQTGWPFVVDHNSRTTWNDRVPSEGPK  
ETPSSANGPSREGSRLPPAREGHPVYPQLRPGYIPIVPLHEGAENRQVHPFHVYPQPMQ  
RFRTEAAAAAPQRSQSLRGMPETTQPKQCGQVAAAAAAPPASHGPERSQSPAASDCS  
SSSSASLPSGRSSLGSHQLPRGYISIPV IHEQNVTRPAAQPSFHQAQKTHYPAQQGEY  
QTHQPVYHKIQGDDWEPRPLRAASPFRSSVQGASSREGSPARSSTPLHSPSPIRVHTVVD  
RPQQPMTHTRETAPVSQPENKPEKPGVGPPELPPGHIPIQVIRKEVDSKPVSKPPPPSE  
KVEVKVPPAPVPCPPSPGPSAVPSSPKSVATEERAAPSTAPAEATPPKPGAEAPPKHP  
GVLKVEAILEKVQGLEQAVDNFEGKTKDKKYLMIIEEYLTKEALLDSVDPEGRADVQRAR  
RDGVRKVQTIKLEKKAIDVPGQVQVYELQPSNLEADQPLQAIMEMGAVAADKGGKKNAG  
NAEDPHTETQQPEATAAATSNPSSMTDTPGNPAAP

>sp|095429|BAG4\_HUMAN BAG family molecular chaperone regulator 4 OS=Homo  
sapiens GN=BAG4 PE=1 SV=1 Site of Methylarginine:40,51,53,108,185,201

MSALRRSGYGPSDGSYGRYYGPGGGDVPVHPPPLYPLRPEPPQPPISWRVRRGGPAET  
TWLGEGGGGDYPSGGAWPEPGRAGGSHQEPPYPSYNSNYWNSTARSRAPYPSTYPVR  
PELQGGSLNSYTNAYGPTYPPPGANTASYSGAYYAPGYTQTSYSTEVPSTYRSSGNP  
TPVSRWIYPQQDCQTEAPPLRGQVPGYPPSQNPGMTLPHYPYGDGNRSVPQSGPTVRPQE  
DAWASPGAYGMGGRYWPSSAPSAPPGNLYMTESTSPWPSSGSPQSPSPVQPKDSSY  
PYSQSDQSMNRHNFPCSVHGYESSGTVNNDSDLLDSQVQYSAEPQLYGNATSDHPNNQD  
QSSSLPEECVPSDESTPPSIKKI IHVLEKVQYLEQEVEEFVGGKTKKAYWLEMLTKEL  
LELDSVETGGQDSVRQARKEAVCKIQAILEKLEKGL

>sp|Q8N163|CCAR2\_HUMAN Cell cycle and apoptosis regulator protein 2 OS=Homo  
sapiens GN=CCAR2 PE=1 SV=2 Site of Methylarginine:16,180,184

MSQFKRQRINPLPGRNFGTASTSLLGPPPGLLTPPVATELSQNRHLQGGEKQRFVFTG  
IVTSLHDYFGVDEEVFFQLSVVKGRLPQLGEKVLKAAAYNPGQAVPWNVAVKVQTLNQP  
LLKSPAPLLHVAALGQKQILGAQPQLIFQPHRIPPLFPQKPLSLFQTSHTLHLSHLNR  
FPARGPHGRLDQGRSDDYDSSKRRKQRAGGEPWGAKKPRHDLPPYRVHLPYTVDSPICDF  
LELQRRYRSLVPSDFLSVHLSWLSAFPLSQPFSLHHSRIQVSSEKEAAPDAGAEPITA  
DSDPAYSSKVLSSPGLEELYRCMLFVDDMAEPRETPEHPLKQIKFLLGRKEEEAVLV  
GGEWSPSLDGLDPPQADPQVLRVTAIRCAQAQTGIDLSGCTKWWRFAEFQYLQPGPPRRLQ  
TVVVYLPDVTWIMPTLEWEALCQQAEEAAPPTQEAQGETEPTAQAPDALEQAADTSRR  
NAETPEATTQETDLDLPEAPPPLEPAVIARPGCVNLSLHGIVEDRRPKERISFEVMVL  
AELFLEMLQRDFGYRVYKMLLSLPEKVVSPPEPEKEEAAKEEATKEEEA IKEEVVKEPKD  
EAQNEGPATESEAPLKEDGLLPKPLSSGEEEEKPRGEASEDLCEMALDPELLLLRDDGE  
EEFAGAKLEDSEVRSVANSQSEMEFSSLQDMPKELDPSAVLPLDCLLAFVFFDANWCGYL  
HRRDLERILLTLGIRLSAEQAKQLVSRVVTQNICQYRSLQYSRQEGLDGGLPEEVLFGNL  
DLLPPPGKSTKPGAAPTEHKALVSHNGSLINVGSLQRAEQQDSGRLYLENKIHTLELKL

EESHNRFSATEVTNKTLAAEMQELRVRLAEAEETARTAERQKSQLRLLQELRRRLTPLQ  
LEIQRVVEKADSWVEKEEPAPSN

>sp|Q8TAP9|MPLKI\_HUMAN M-phase-specific PLK1-interacting protein OS=Homo sapiens GN=MPLKIP PE=1 SV=1 Site of Methylarginine:57, 59, 68, 126

MQRQNFPPPTPPYPGPGGGWGSSSFRGTPGGGPRPPSPRDGYGSPHHTPPYGPRSRP  
YGSSHSRPHGGSFPGGRFGSPSPGGYPGSYSRSPAGSQQFQGYSPGQQQTHPQGSPTST  
PFGSGRVREKRMSNELENYFKPSMLEDPWAGLEPVSVVDISQQYSNTQTFTGKKGRYFC

>sp|Q92530|PSMF1\_HUMAN Proteasome inhibitor PI3l subunit OS=Homo sapiens GN=PSMF1 PE=1 SV=2 Site of Methylarginine:205, 231

MAGLEVLFAASAAPAITCRQDALVCFLHWEVVTGHYFGLGVGDQPGPNDKKSSELLPAGWNN  
NKDLYLRYEYKDGSRKLLVKAITVESSMILNVLEYGSQQVADLTNLDDYIDAHLGDF  
HRTYKNSEELRSRIVSGIITPIHEQWEKANVSSPHREFPPATAREVDPLRIPPHHPTSR  
QPPWCDPLGPFVVGEDLDPFGPRRGGMIVDPLRSGFPRALIDPSSGLPNRLPPGAVPPG  
ARFDPFGPIGTSPPGPNPDHLPPPYYDDMYL

>sp|Q6Y7W6|PERQ2\_HUMAN PERQ amino acid-rich with GYF domain-containing protein 2 OS=Homo sapiens GN=GIGYF2 PE=1 SV=1 Site of Methylarginine:107, 118, 120, 149

MAAETQTLNFGPEWLRALSSGGISITSPPLSPALPKYLADYRYGREMLALFLKDNKIPS  
DLLDKEFLPILQEEPLPLALVPFTEEEQRNFSMSVNSAAVLRLTGRGGGGTVVGAPRGR  
SSSRGRGRGRGECGFYQRSFDEVEGVFGRGGGEMHRSQSWEERGDRRFKPKRQKDVGRP  
NFEEGGPTSVGRKHFEIRSESENWRIFREEQNGEDEDGGWRLAGSRRDGERWRPHSPDGP  
RSAGWREHMERRRFEFDFRDRDDERGYRRVRSVSGSIDDDRSLPEWCLEDAEEEMGTF  
DSSGAFSLKVKQKEPIPEEQEMDFRPVDEGECSDEGSHNEEAKPEPKTKNKEGEKTD  
RVGVEASEETPQTSSSSARPGTPSDHQSQEASQFERKDEPKTEQTEKAEETRMENSLPA  
KVPSRGDEMADVQQPLSQIPSDTASPLLILPPVPNPSPTLRPVETPVVQVGMGVSST  
EPDDEEGLKHLEQQAEMVAYLQDSALDDERLASKLQEHRAKGVSIPLMHEAMQWYYKD  
PQGEIQGPFNNQMAEWFQAGYFTMSLLVKRACDESFQPLGDMKMWGRVPFSPGPAPP  
HMGELDQERLTRQQELTALYQMQLQYQQFLIQQQYAQVLAQQQKAALSSQQQQQLALLL  
QQFQTLKMRISDQNIIPSVTRSVSVPDTGSIWELQPTASQPTVWEGGSVWDLPLDTTTPG  
PALEQLQQLEKAKAAKLEQERREAEMRAKREERKREELRRQQEEILRRQQEEERKRR  
EEEELARRQEEALRRQREQEIALRRQREERQQQEEALRRLEERRREERKQEEELL  
RKQEEEAAKWAREEEEAQRRLLENRLMEEEAARLRHEEERKRKELEVQRQKELMRQRQ  
QQQALRRLQQQQQQQLAQMKLPSSTWGQSNNTTACQSQATLSLAEIQKLEERERQL  
REEQRQQRELKALQQQQQQQKLSGWGNVSKPSGTTKSLLEIQQEEARQMQKQQQQQ  
QQHQPNRARNNTHSNLHTSIGNSVWGSINTGPPNQWASDLVSSIWSNADTKNSNMGFWD  
DAVKEVGPRNSTNKNKNNASLSKSVGVSNRQNKVVEEELKLLKLFQGVNKAQDGFTQWCE  
QMLHALNTANNLDVPTFVSFLKEVESPYEVHDYIRAYLGDTSEAKEFAKQFLERRAKQKA  
NQRQQQLPQQQQQPPQPQQPQQQDSVWGMNHSTLHSVFQTNQSNQQSNFEAVQS  
GKKKKKQKMRADPSLLGFSVNASSERLNMGEIETLDDY

>sp|Q92686|NEUG\_HUMAN Neurogranin OS=Homo sapiens GN=NRGN PE=1 SV=1 Site of Methylarginine:38, 68

MDCCTENACSKPDDILDIPDDPGANAAAAKIQASFRGHMARKKIKSGERGRKGPGGG  
PGGAGVARGGAGGPGSGD

>sp|P04792|HSPB1\_HUMAN Heat shock protein beta-1 OS=Homo sapiens GN=HSPB1 PE=1 SV=2 Site of Methylarginine:5, 12, 56

MTERRVPFSLLRGPSWDPFRDWPYHPSRLFDQAFGLPRLPEEWSQWLGSSWPGYVRPLPP  
AAIESPAVAAPAYSRALSRQLSSGVSEIRHTADRWRVSLDVFHAPDELTVKTKDGVVEI  
TGKHEERQDEHGYISRCFTRKYTLPPGVDPTQVSSLSPEGLTVEAPMPKLATQSNEIT  
IPVTFESRAQLGGPEAAKSDETAAK

>sp|Q6PJG2|EMSA1\_HUMAN ELM2 and SANT domain-containing protein 1 OS=Homo  
sapiens GN=ELMSAN1 PE=1 SV=2 Site of Methylarginine:227, 447

MNLQAQPKAQNKRRCLFGGQEPAPKEQPPPLQPPQSIIRVKEEQYLGHEGPGGAVSTSQ  
PVELPPSSLALLNSVYGPERTSAAMLSQQVASVKWPNSVMAPGRGPERGGGGVSDSS  
WQQQPGQPPHSTWNCHSLSLYSATKGSHPGVGVPTYYNHPEALKREKAGGPQLDRYVR  
PMMPQKQVLEVGRQPALNSFHAAKKPPNQSLPLQPFQLAFGHQVNRQVFRQGPVPPNPV  
AAFPPKQKQQQQQPPQQQQQQAALPQMPLFENFYSMPQQPSQQPQDFGLQPAGPLGQSH  
LAHSMAPYPPPNPDMNPELRKALLQDSAPQALPQVQIPFRRSRRLSKEGILPPSAL  
DGAGTQPGQEATGNLFLHHPWLQQPPGSLGQHPHEALGFPELRESQLLPDGERLAPNG  
REREAPAMGSEEGMRAVSTGDCGQVLRGGVIQSTRRRRRASQEANLLTAAKAVELASLQ  
NAKDGSGSEEKRSVLASTTKCGVEFSEPSLATKRAREDSGMVPLIIPVSVVVRTVDPTE  
AAQAGLDEDGKQPEQNAEHKPSVIVTRRRSTRIPGTDAQAQAEDMNVKLEGEPSVRKP  
KQRPRPEPLIIPTKAGTFIAPPVYSNITPYQSHLRSPVRLADHPSEFSFELPPYTPPPIL  
SPVREGSGLYFNAIISTSTIPAPPPITPKSAHRTLLRTNSAEVTPPVLSVMGEATPVSIE  
PRINVGSRFQAEIPLMRDRALAAADPHKADLVWQPWEDLESSREKQRQVEDLLTAACSSI  
FPGAGTNQELALHCLHESRGDILETLNKLKPLRPHNPLATYHYTGSDQWMAERKL  
FNKGIAYKKDFLVLQKLIQTKTVAQCVFYYTYKKQVKIGRNGTLTFGDVDTSDKSAQ  
EEVEVDIKTSQKFPVPLPRRESPSEERLEPKREVKEPRKEGEEVPEIQEKKEEKEGRE  
RSRRAAAVKATQTLQANESASDILILRSHESSNAPGSAGGQASEKPREGTGKSRRALPFSE  
KKKKTETFSKTQNQENTFPCKKCGR

>sp|P62633|CNBP\_HUMAN Cellular nucleic acid-binding protein OS=Homo sapiens  
GN=CNBP PE=1 SV=1 Site of Methylarginine:27, 30, 79

MSSNECFKGRSGHWARECPTGGGRGRGMRSRGRGGFTSDRGFQVSSSLPDICYRCGES  
GHLAKCDLQEDACYNCGRGGHIAKDCKEPREREQCCYNCGKPGHLARDCDHADEQKCY  
SCGEFGHIQKDKTKVYCYRCGETGHVAINCSKTSEVNCYRCGESGHLARECTIEATA

>sp|Q6ZRQ5|MMS22\_HUMAN Protein MMS22-like OS=Homo sapiens GN=MMS22L PE=1 SV=3  
Site of Methylarginine:366, 374

MENCSAASTFLTDSLELELGTWCKPPYFSCAVDNRRGGKHFSGESYLCGALKRLILNL  
DPLPTNFEEDTLEIFGIQWVTETALVNSSRELFHLFRQQLYNLETLLQSSCDFGKVSTLH  
CKADNIRQQCVLFLHYVKVIFRYLKVQNAESHVPVHPYEALQPSVLIIDELHGLLLY  
IGHLSELPSVNIAGFVNQNIKLFPPSWHLLHLHLDIHVLVLEILYMLGEKQVQVYGHQ  
FMNLASDNLTNISLFEHCETLLCDLISLSLNRYDKVRSSESLMSDQCPCLCIKELWVLL  
IHLLDHRKWFVSESFWNWLNKLLKTLLEKSSDRRRSSMPVIQSRDPLGFSWWIITHVAS  
FYKFDHRHVPDEMRRKVESNWNFVEELLKKSISVQGVILEEQRLMYLHCCLTLCDFWEPNI  
AIVTILWEYYSKNLSSFSISWLPFKGLANTMKSPLSLEMVKTCCCDKQDQELYKSSSS  
YIFLCLAKVVKAMKSNPHPWKQVKGRIYSKFHQKRMEELETEVGLQNFSLFLLAA  
VAEVEDVASHVLDLLNFKPAFVTSQRALIWKGHMAFLMYAQKNLDIGVLAEFSCAFR  
EKAKEFLVSKNEEMVQRQTIWTLLSIYIDGVQEVFETSYCLYPSHEKLLNDGFSMLLRAC  
RESELRTVLSFLQAVLARIRSMHQQLCQELQRDNDVDFVQSSLSAKERHLAAVASALWRH  
FFSFLKSQRMSQVVPFSQLADAAAADFTLLAMDMPSTAPSDFPQPVISIIQLFGWDDIIC



PQVVARYLSHVLQNSTLCEALSHSGYVSFQALTVRSWIRCVLQMYIKNLSGPDDLLIDKN  
LEEAVEKEYMKQLVKLTRLLFNLSVKSIFSKAQVEYLSISEDPKKALVRFEEAVGVTYG  
NVQTLSDKSAMVTKSLEYLGEVLKYIKPYLGKKVFSAGLQLTYGMMGILVKSWAQIFATS  
KAQKLLFRIIDCLLLPHAVLQQEKELPAPMLSAIQKSLPLYLQGMCI VCCSQNPAYLN  
QLLGNVIEQYIGRFLPASPYVSDLGQHPVLLALRNTATIPPISSLKKCIVQVIRKSYLEY  
KGSSPPRLASILAFILQLFKETNTDIYEVELLLPGILKCLVLVSEPQVKRLATENLQYM  
VKACQVGSEEEPSSQLTSVFRQFIQDYGMRYYYQVYSILETVATLDQQVVIHLISTLTQS  
LKDSEQKWGLGRNIAQREAYSKLLSHLGQMGQDEMQRLENDNT

>sp|Q9BRQ0|PYG02\_HUMAN Pygopus homolog 2 OS=Homo sapiens GN=PYG02 PE=1 SV=2

Site of Methylarginine:105, 131

MAASAPPPDKLEGGGGPAPPAPPSTGRKQKAGLQMSPEKKRRKSNTQGPAYSHLTE  
FAPPPTPMVDHLVASNPFEDDFGAPKVGVAAPPFLGSPVFPFGFRVQGGMAGQVPPGYST  
GGGGGQPLRRQPPFPNPMGPAFNMPQPGYPPGNMNFPSQPFNQPLGQNFSPPSG  
QMMPGVGGFGPMISPTMGQPRAELGPPSLSRFAQPGAPFGPSPLQRPGQGLPSLPPN  
TSPFPGDPGFPGGEDGGKPLNPPASTAFPQEPHSGSPAAVNGNQPSFPPNSSGRGG  
GTPDANSLAPPKAGGGSGPQPPGLVYPCGACRSEVNDQDAILCEASCQKWFHRECTG  
MTESAYGLLTTEASAVWACDLCLKTKEIQSVYIREGMQLVAANDG

>sp|P18583|SON\_HUMAN Protein SON OS=Homo sapiens GN=SON PE=1 SV=4 Site of

Methylarginine:936, 943, 950, 997, 1015, 1090, 1112

MATNIEQIFRSFVSKFREIQQELSSGRNEGQLNGETNTPIEGNQAGDAAASARSLPNEE  
IVQKIEEVLVSGVLDTELRYKPDLEKSRKSRCSVQTDPTDEIPTKSKKHKHKHKKHKK  
KKKEKEKYYKRQPEESESKTKSHDDGNIDLESDFLKFDEPSAVALLELPTRAFSPSETN  
ESPAVVLEPPVSMVESEPHILETLKPKATKAELSVVSTSVISEQSEQSVAVMPEPMTK  
ILDSFAAAVPTTTLVLKSSEPVVMSVEYQMKSVLKSVESTSPEPSKIMLVEPPVAKVL  
EPSETLVVSSETPTEVYPEPSTSTTMDFPESAIEALRLPEQPVDVPSEIADSSMTRPQE  
LPELPKTTALELQESSVASAMELPGPPATSMPELQGGPVTPVLELPGSATPVPELPGPL  
STPVPELPGPPATAVPELPGPSVTPVPQLSQELPGLPAPSMGLEPPQEVPEPPVMAQELP  
GLPLVTAAVELPEQPAVTVAMELTEQPVTTELEQPVGMTTVEHPGHPEVTTATGLLGQP  
EATMVLELPGQPVAATTALELPGQPSVTGVPELPGPLSATRALELSGQPVATGALELPGPL  
MAAGALEFSGQSGAAGALELLGQPLATGVLELPGQGAPELPGQPVAATVALEISVQSVVT  
TSELSTMTVSQSLEVPSTTALESYNTVAQELPTTLVGETSVTVGVDPLMAPESHILASNT  
METHILASNTMDSQMLASNTMDSQMLASNTMDSQMLASSTMDSQMLATSSMDSQMLATSS  
MDSQMLATSTMDSQMLATSSMDSQMLATSSMDSQMLATSSMDSQMLATSSMDSQMLATST  
MDSQMLATSTMDSQMLATSSMDSQMLASGTMDQMLASGTMDAQMLASGTMDAQMLASST  
QDSAMLGSKSPDPYRLAQDPYRLAQDPYRLGHPYRLGHDAYRLGQDPYRLGHPYRLTP  
DPYRMSRPYRIAPRSYRIAPRPYRLAPRPLMLASRRSMMSYAAERSMMSYERSMMSY  
ERSMMSPAERSMMSAYERSMMSAYERSMMSPAERSMMSAYERSMMSAYERSMMSPMAD  
RSMMSMGADRSMMSYSAADRSMMSYSAADRSMMSYTAADRSMMSMAADSYTDSYTDY  
TEAYMVPLPPEEPPTMPLPPEEPPMTPLPPEEPPEPALPTEQSALTAENTWPTEVP  
SSPSEESVSQPEPPVSQSEISEPSAVPTDYSVSASDPSVLVSEA AVTVPEPPPEPESSIT  
LTPVESAVVAEEHEVPERPVTCMVSETPAMSAEPTVLASEPPVMSETAETFD SMRASGH  
VASEVSTSLVPAVTPVLAESILEPPAMAPESSAMAVLESSAVTVLESSTVTVLESST  
VTVLEPSVVTVPPEPPVAEPDYVTIPVPVVSALEPSVPVLEPAVSVLQPSMIVSEPSVSV  
QESTVTVSEPAVTVSEQTQVIPTEVAIESTPMILESSIMSHVMKGINLSSGDQNLAPEI

GMQEIALHSGEEPHAEHLKGDIFYESEHGINIDLNINNHLIAKEMEHNTVCAAGTSPVGE  
IGEEKILPTSETKQRTVLDITYPGVSEADAGETLSSTGPFALP DATGT SKGIEFTTASTL  
SLVNKYDVDLSLTTQDTEHDMVISTSPSGGSEADIEGLPAKDIHLDLPSNNLVSKDTE  
EPLPVKESDQTLAALLSPKESGGGEKVPKPPKETLPDSGFSANIEDINEADLVRPLLPK  
DMERLTS LRAGIEGPLLASDVGRDRSAASPVVSSMPERASESSSEEKDDYEIFVKVDTH  
EKSKKNKNRDKGEKEKRDSSLRSRKRKSKSEHKSRKRTSESRSRARKRSSKSKSHRSQ  
TRSRSRRRRRRSRSRKRGRSVSKEKRRSPKHSKSRERKRRKSSSRDNRKT VRA  
RSRTPSRRSRSHTPSRRRRSRSGRRRSFSISPSRRSRTPSRRSRTPSRRSRTPSRRSRT  
PSRRSRTPSRRSRTPSRRRSR SVRRRSFSISPVLRRTPLRRRF SRSP IRRKRSRS  
SERGRSPKRLTDLKAQLEIAKANAAMCAKAGVPLPPLNKPAPPPTIEEKVAKKSGGA  
TIEELTEKCKQIAQSKEDDDVIVNKPHVSDDEEEEPFYHHPFKLSEPKPIFFNLNIAAA  
KPTPPKSQVTLTKEFPVSSGSQHRKKEADSVYGEWVPVEKNGEENKDDDNV FSSNLPSEP  
VDISTAMSERALAQRLSENAFDLEAMSLNRAQERIDAWAQLNSIPGQFTGSTGVQVLT  
QEQ LANTGAQAWIKKQFLRAAPVTGGMGAVLMRKMGWREGELGKNKEGNKEPILVDFK  
TDRKGLVAVGERAQKRSGNFS AAMKDLGKHPVSALMEICNKRRWQPPEFLLVHDSGPDH  
RKHFLFRVLRNGALTRPNCMFFLNRY

>sp|Q14966|ZN638\_HUMAN Zinc finger protein 638 OS=Homo sapiens GN=ZNF638 PE=1  
SV=2 Site of Methyarginine:33, 41, 47, 49, 54

MSRPRFNPRGDFPLQRPRAPNPSGMRPPGPFMRPGSMGLPRFY PAGRARGIPHRFAGHES  
YQNMGPQRMNVQVTQHRTDPRLTKEKLD FHEAQQKKGKPHGSRWDDEPHISASVAVKQSS  
VTQVTEQSPKVQSRYTEKESASSILASFGLSNEDLEELSRYPDEQLTPENMPLILRDIRMR  
KMGRRLPNLPSQSRNKETLGSEAVSSNVIDYGHASKYGYTEDPLEVRIYDPEIPTDEVEN  
EFQSQQNISASVNPVNICNSMFPVEDVFRQMDPFGESSNNRSFFSVESGTKMSGLHISG  
GQSVLEPIKSVNQSIQTVSQTMSQSLIPPSMNQQPFSSSELISVSQQERIPHEPVINSS  
NVHVGSRGSKKNYQSQADIPIRSPFGIVKASWLPKFSHADAQKMKRLPTPSMMNDYYAAS  
PRIFPHLCSLNCNVECSHLKDWIQHQNTSTHIESCRQLRQQYPDWNPEILPSRRNEGNRKE  
NETPRRRSHSPRRSRSSSHRFRRSRSPMHYMRPRSRSPRICHRFISRYRSRSRSR  
SPYRIRNPFGRGSPKCFRSVSPERMSRRSVRSSDRKKALEDVVQRSGHGTEFNKQKHLEAA  
DKGHSPAQKPKTSSGTPSKVPTSATKSDSNLGGHSIRCKSKNLEDDLSECKQVSDKAV  
SLQRKLKEQSLHYGSVLLITELPEDGCTEEDVRKLFQPFQKVNVDLIVPYRKEAYLEME  
FKEAITAIMKYIETPLTIKGSVKICVPGKKAQKNEVKKKTLESKKVSASTLKR DADA  
SKAVEIVTSTSAKTGQAKASVAVKNKSTGKSASSVKS VVTAVKGNKASIKTAKSGGK  
SLEAKKTGNVKNKDSNKPVTIPENSEIKTSIEVKATENCAKEAISDAALEATENEPLNKE  
TEEMCVMLVSNLPNKGYSVEEVYDLAKPFGGLKDILILSSHKKAYIEINRKAESMVKFY  
TCFPVLM DGNQLSISMAPENMNKDEEAIFITLVKENDPEANIDTIYDRFVHLDNLPEDG  
LQCVLCVGLQFGKVDHVFISNRNKAILQLDSPESAQSMYSFLKQNPQNI GDHMLTCSLS  
PKIDLPEVQIEHDPELEKESPLKNSPIDESEVQTATDPSVKPNELEEEESTPSIQTETL  
VQQEPCEEEAEKATCDSDFAVETLELETQGEVKEEIPLVASASVSEIEQFTENAEECAL  
NQQMFSNDLEKKGAEIINPKTALLPSDSVFAEERNLKGILEESPSEAEDFISGITQTMVE  
AVAEVEKNETVSEILPSTCIVTLVPGIPTGDEKTVDKKNISEKKGNDKEKEEFNTKET  
RMDLQIGTEKAEKNEGRMDAEKVEKMAAMKEKPAENTLFKAYPNKGVGQANKPDETSKTS  
ILAVSDVSSSKPSIKAVIVSSPKAKATVSKTENQKSFPKSVPRDQINAEKKLSAKEFGLL  
KPTSARSGLAESSKFKPTQSSLTRGGSGRISALQGKLSKLDYRDITKQSQETEARPSIM  
KRDDSNKTLAEQNTKNPKSTTGRSSKSKEEPLFPFNLDEFVTVDEVEIEVNPSQAKQNP

LKGRKRETLKNVPSSELNLKKKKGKTSTPRGVEGELSFVTLDEIGEEEDAAAHLAALVT  
VDEVIDEELNMEEMVKNSNSLFTLDELIDQDDCISHSEPKDVTVLSVAEEQDLLKQERL  
VTVDEIGEVEELPLNESADITFATLNTKGNEDTVRDSIGFISSQVPEDPSTLTVDEIQ  
DDSSDLHLVTLDEVTEDEDSLADFNLKEELNFVTVDEVGEEEDGDNDLKVELAQSKND  
HPTDKKGNRKKRAVDTKKTKLESLSQVGPVNENMEEDLKTMIERHLTAKTPTKRVIRIGK  
TLPSEKAVVTEPAKGEAFQMSEVDEESGLKDSEPERKRRKTEDSSSGKSVASDVPEELD  
FLVPKAGFFCPCISLFYSGEKAMTNHCKSTRHKQNTTEKFMKQRKEKEQNEAEERSSR

>sp|043896|KIF1C\_HUMAN Kinesin-like protein KIF1C OS=Homo sapiens GN=KIF1C PE=1  
SV=3 Site of Methylarginine:948, 958, 963, 1041

MAGASVKVAVRVRPFNARETSQDAKCVSMQGNNTTSIINPKQSKDAPKSFTFDYSYWSHT  
STEDPQFASQQQVYRDIGEEMLLHAFEGYNVCIFAYGQTGAGKSYTMMGRQEPGQQGIVP  
QLCEDLFSRVSENQSAQLSYSVEVSYMEIYCERVRDLLNPKSRGSLRVREHPILGPYVQD  
LSKLAVTSYADIADLMDCGNKARTVAATNMNETSSRSHAVFTIVFTQRCHDQLTGLDSEK  
VSKISLVDLAGSERADSSGARGMRLKEGANINKSLTTLGKVISALADMQSKKRKSDFIPIY  
RDSVLTWLLKENLGGNSRTAMIAALSPADINYEETLSTLRYADRTKQIRCNAIINEDPNA  
RLIRELQEEVARLRELLMAQGLSASALEGLKTEEGSVRGALPAVSSPPAPVSPSSPTTHN  
GELEPSFSPNTESQIGPEEAMERLQETEKI I AELNETWEEKLRKTEALRMEREALLAEMG  
VAVREDGGTVGVFSPKKTPHLVNLNEDPLMSECLLYHIKDGVTRVGQVDMIDIKLTGQFIR  
EQHCLFRSIPQPDGEVVVTLPECEGAETYVNGKLVTEPLVLKSGNRIVMGKNHVFRFNHP  
EQARLERERGVPPPPGPPSEPVDWNFAQKELLEQQGIDIKLEMEKRLQDLENQYRKEKEE  
ADLLEQQRLYADSDSGDSDKRSCEESWRLISSLREQLPPTTVQTIKRCGLPSSGKRR  
APRRVYQIPQRRRLQGKDPRAWATMADLKMQAVKEICYEVALADFRHGRAEIEALAALKMR  
ELCRTYGKPDGPGDAWRAVARDVWDTVGEEEGGGAGSGGGSEEGARGAEVEDLRAHIDKL  
TGILQEVKLQNSSKDRELQALRDRMLRMERVIPLAQDHEDENEEGGEVPWAPPEGSEAAE  
EAAPSDRMP SARPPSPPLSSWERVSRMEEDPAFRRGRLRWLQEQRLRLQGLQSGGRRG  
GLRRPPARFVPPHDKLRFPFKSNPQHRESWPGMGSGEAPTLPQPEEVTPHPATPARRP  
PSPRRSHHPRRNSLDGGGRSRGAGSAQPEPQHFQPKKHNSYPQPPQYPYAPRPPGPRYP  
YTTPPRMRQRSAPDLKESGAAV

>sp|P08727|K1C19\_HUMAN Keratin, type I cytoskeletal 19 OS=Homo sapiens GN=KRT19  
PE=1 SV=4 Site of Methylarginine:7, 24, 32, 43, 51

MTSYSYRQSSATSSFGGLGGGSRVFGPGVAFRAPS IHGGSGGRGVSVSARFVSSSSSGA  
YGGYGGVLTASDGLLAGNEKLTMQNLNDRLASYLKVRALAEANGELEVKIRDWYQKQG  
PGPSRDYSHYTTIQDLRDKILGATIENSRIVLQIDNARLAADDFRTKFETEALRMSVE  
ADINGLRRVLDLTLARTDLEMQIEGLKEELAYLKKNHHEEISTLRGQVGGQVSVEVDSA  
PGTDLAKILSDMRSQYEVMAEQNRKDAEAWFTSRTEELNREVAGHTEQLQMSRSEVTDLR  
RTLQGLEIELQSQLSMKAALEDTLAETEARFGAQLAHIQALISGIEAQLGDVRADSERQN  
QEYQRLMDIKSRLEQEIATYRSLEGGQEDHYNNLSASKVL

>sp|P05787|K2C8\_HUMAN Keratin, type II cytoskeletal 8 OS=Homo sapiens GN=KRT8  
PE=1 SV=7 Site of Methylarginine:18, 23, 32, 40, 47

MSIRVTQKSYKVSTSGPRAFSSRSYTSGPSRISSSSSFSRVGSSNFRGGLGGYGGASGM  
GGITAVTVNQSLSPLVLEVDPNIQAVRTQEKEQIKTLNKFASFIDKVRFLEQQNKMLE  
TKWSLLQQQKTARSNMDNMFESYINNLRRLQLETLGQEKLEAELGNMQGLVEDFKNKYE  
DEINKRTEMENEFVLIKKDVDEAYMNKVELESRLGLETLDEINFLRQLYEEEIRELQSQIS  
DTSVVLSDMNSRSLDMSIIAEVKAQYEDIANRSRAEAESMYQIKYEELQSLAGKHGDDL

RRTKTEISEMNRNISRLQAEIEGLKGRASLEAAIADAEQRGELAIKDANAKLSELEAAL  
QRAKQDMARQLREYQELMNVKLALDIEIATYRKLEGEESRLESGMQNMSIHTKTTSGYA  
GGLSSAYGGLTSPGLSYSLSGSSFGSGAGSSSFSRTSSSRVVVKKIETRDGKLVSESSDV  
LPK

>sp|Q7Z736|PKHH3\_HUMAN Pleckstrin homology domain-containing family H member 3  
OS=Homo sapiens GN=PLEKHH3 PE=1 SV=2 Site of Methylarginine:638,642

MPLPGGLWLLCCRRGFTLLHRDYGDGELSGDGEDEDEEETFELRTPSPAGGGRGPLEVT  
LTQPVRSRGPVSNRLQSWEETWSLIPEKGLPEDDPDIVVKGWLYREPRGGGARPWLPARRA  
WFVLTRDSDLQFSSSGKGARRLGSVLVLSLCSVTGPERRRRKETGLWSVTVSGRKHSVRLC  
SPRQAEAEERWGVALREVIASKAPLETPTQLLLRDIQESCGDPEAVALIYLRNPILRHTSG  
ALYAPLLPLPYGVSAPGPGYAPLREEAVRLFLALQALEGARRPGPLMQGVLQTCRDLPAL  
RDEFLQLAKQTSGPAGPPGLPATQDPAALRYWQLTMCSTFRPGGAVRGHLLGHLERT  
EQALPDSELAEYARFIRKALGRTRGRELVP SLAEISALSQRQELLCTVHCPGAGACAVAI  
DSHTTAGEVARELVGRLGLARSNAFALYEQRGAQERALAGGTLVADVLTRFENLAAEEA  
GLEDSPDSGWRLCLRHLGPHPEGLSPDGHELPFLFEQAHALLRGRPPPPDDTLRALAA  
LRLQSLQRDFSPRVPLRLDRLLPPPAPPREDPPRPTPRPPPSAALLAGALWSPGLAKRR  
AERARRGGAGRTAGSIAREGGGAGTAAAVLGGWKRLRGMGRAEAMAAYLALAAQCPGFG  
AARYDVLELSTEPGRGAPQKLCGLGAKAMSLSRPGETEPIHSVSYGHVAACQLMGPHTL  
ALRVGESQLLQSPQVEEIMQLVNAYLANPSPERPCSSSSPPCQDLPDTSPPSQRPGLDE  
PQQQSGCLGQLQD

>sp|060293|ZC3H1\_HUMAN Zinc finger C3H1 domain-containing protein OS=Homo  
sapiens GN=ZFC3H1 PE=1 SV=3 Site of Methylarginine:95,99

MATADTPAPASSGLSPKEEGELEDEGISDDDNNSQIRSRSSSSSSGGLLPYRRRPPHS  
ARGGGSGGGSSSSSSSSSQQLRNFSRSHASERGHLRGPSSYRPKEPFRSHPPSVRMP  
SSSLESSPRPSFWERSHLALDRFRFRGRPYRGGSRWSRGRVGERGGKPGCRPPLGGGA  
GSGFSSSQSWREPSPPRKSFSGRSPSRKQNYSSKNENCVEETFEDLLLKYKQIQLELE  
CINKDEKLALSSKEENVQEDPKTLNFEDQTSTDNVSITKDSKEVAPEEKTQVKTFQAFE  
LKPLRQKLTLPGDKNRLKKVKDGAKPLSLKSDTTDSSQGLQDKEQNLTRRISTSDILSEK  
KLGEDEEELSELQLRLLALQSASKKQQKEQQVMKESKEKLTTKTKVQQKVKTSKTHSA  
KKVSTTAKQALRQQTKAWKQLQQQKEQERQKEEDQRKQAEERERRKREERIRKIRDLSN  
QEEQYNRFMKLVGGKRRSRKSSDPDLRRSLDKQPTDSSGGIYQYDNYEEVAMTDSETS  
SPAPSPVQPPFFSECSLGYFSPAPSLSLPPPQVSSLPPLSQPYVEGLCVSLEPLPPLPP  
LPPLPPEDPEQP KPPFADEEEEEEMLLREELLKSLANKRAFKPEETSSNSDPPSPVNLN  
NSHPVPRSNLSIVSINTVSQPRIQNPKFHRGPRLPRTVISLPHKSVVVTLNDSDDSED  
GEASKSTNSVFGGLESMIKEARRTAEQASKPKVPPKSEKENDPLRTPALPEEKIEYRL  
LKEEIANREKQRLIKSDQLKTSSSSPANSDVEIDGIGRIAMVTKQVTDAESKLLKHRILL  
MKDESVLKNLVQEAKKKESVRNAEAKITKLTQEQATEKILNVNRMFLKQLQEQIHRVQ  
QRVTIKKALTLYGEELARAKAVASKEIGKRKLEQDRFGPNKMMRLDSSPVSSPRKHSAE  
LIAMEKRRQLKLEYEYALKIQKLEARALKAKEQQNISPVVEEPEFSLPQPSLHDLTQD  
KLTLTDEENDVDDEILSGSSRERRRSFLESNYFTKPNLKHTDTANKECINKLNKNTVEKP  
ELFLGLKIGELQKLYSKADSLKQLILKTTTGITEKVLHGQEISVDVDFVTAQSKTMEVKP  
CPFRPYHSPLL VFKSYRFSPPYRTKEKLP LSSVSYSNMIEPDQCFCRFDLTGTCNDDDCQ  
WQHIQDYTLRKLQFQDILSYNLSLIGCAETSTNEEITASAEKYVEKLFVGNKDRMSMDQ  
MAVLLVSNINESKGHTPPFTTYKDKRKKWPKFWRKPI SDNSFSSDEEQSTGPIKYAFQPE

NQINVPALDVTVPDDVRYFTNETDDIANLEASVLENPSHVQLWLKLAYKYLNQNEGECS  
ESLDSALNVLARALENNKDNPEIWCHYLRLFSKRGTKDEVQEMCETAVEYAPDYQSFWTF  
LHLESTFEEDYVCCERMLEFLMGAAKQETSNI LSFQLEALLFRVQLHIFTGRCQSALAI  
LQNALKSANDGIVAEYLKTSRCLAWLAYIHLIEFNILPSKFYDPSNDNPSRIVNTESFV  
MPWQAVQDVKTNPDMLLAVFEDAVKACTDESLAVEERIEACLPLYTNMIALHQLLERYEA  
AMELCKSLLESCPINCLLEALVALYLQTNQHDKARAVWLTAFEKNPQNAEVFYHMCKFF  
ILQNRGDNLLPFLRKF IASFFKPGFEKYNNLDLFRYLLNIPGPIDIPSR LCKGNFDDDMF  
NHQVPYWLVIYCLCHPLQSSIKETVEAYEAALGVAMRCDIVQKIWM DYLVFANNRAAGSR  
NKVQEFKFFTDL VNRCLVTVPARYPIPFSSADYWSNYEFHNRVIFFYLSVCPKTQHSKTL  
ERFCSVMPANGLALRLLQHEWEESNVQILKLQAKMFTYNIPTCLATWKIATAAEIVLKG  
QREVRHLYQRALQKLP L CASLWKDQLLFEASEGGKTDNLRKLVSKCQEIGVSLNELLNLN  
SNKTESKNH

>sp|P13646|K1C13\_HUMAN Keratin, type I cytoskeletal 13 OS=Homo sapiens GN=KRT13  
PE=1 SV=4 Site of Methylarginine:27, 35

MSLRLQSSSASYGGGFGGGSCQLGGGRGVSTCSTRFVSGGSAGGYGGGVSCGFGGGAGSG  
FGGGYGGGLGGYGGGLGGGFGGGFAGGFVDFGACDGLLTGNEKITMQNLNDR LASYLE  
KVRAL E E ANADLEVKIRDWHLKQSPASPERDYSPYYK TIEELRDKILTATIENNRVILEI  
DNARLAADD FRLKYENELALRQSVEADINGLRRVLDLTL SKTDLEMQIESLNEELAYMK  
KNHEEEMKEFSNQVVGQVNVEMDATPGIDL TRVLAEMREQYEAMAERNRRDAEEWFHTKS  
AELNKEVSTNTAMIQTSKTEITELRRTLQGLEIELQS QLSMKAGLENTVAETECRYALQL  
QQIQGLISSIEAQLSELRSEMECQNQEYKMLLDIKTRLEQE IATYRSLLLEGQDAKMIGFP  
SSAGSVSPRSTSVTTTSSASVTTTASNAGRRTSDVRRP

>sp|P08729|K2C7\_HUMAN Keratin, type II cytoskeletal 7 OS=Homo sapiens GN=KRT7  
PE=1 SV=5 Site of Methylarginine:25, 46, 48

MSIHFSSPVFTSRSAAFSGRGAQVRLSSARPGGLGSSSLYGLGASRPVAVRSAYGGPVG  
AGIREVTINQSL LAPRLDADPSLQRVRQE ESEQIKTLNKFASFIDKVRFLEQQNKLE  
TKWTLLEQEQSAKSSRLPDIFEAQIAGLRGQLEALQVDGGRLEAELRSMQDVVDFK NKY  
EDEINHRTAAENEFVVLK KDVDAAAYMSKVELEAKVDALNDEINFLRTLNETELTELQSQI  
SDTSVVLSMDNSRSLDLGIIAEVKAQYEEMAKCSRAEAEAWYQTKFETLQAQAGKHGDD  
LRNRTRNEISEMRAIQRLQAEIDNIKNQRAKLEAAIAEAEERGELALKDARAKQEELEAA  
LQRGKQDMARQLREYQELMSVKLALDIEIATYRKLLEGEESRLAGDGVGAVNISVMNSTG  
GSSSGGGIGLTLGGTMSGNALSFSSSAGPGLLKAYSIRTASASRRSARD

>sp|000571|DDX3X\_HUMAN ATP-dependent RNA helicase DDX3X OS=Homo sapiens  
GN=DDX3X PE=1 SV=3 Site of Methylarginine:88, 93, 95, 617, 632

MSHVAVENALGLDQQFAGLDLNSSDNQSGGSTASKGRYIPPHLRNREATKGFYDKDSSGW  
SSSKDKDAYSSFGSRSDSRGKSSFFSDRGSRSRGRFDDRGRSDYDGI GSRGDRSGFGKFE  
RGGNSRWCDKSD EDDWSKPLPPSERLEQELFSGGNTGINF EKYDDIPVEATGNNCPPHIE  
SFSDVEMGEIIMGNIELTRYTRPTPVQKHAIP I I KEKRDLMACAQ TGS GKTA AFLLPILS  
QIYSDGPGEALRAMKENG RYGRRKQYPI SLVLAPTRELAVQIYEEARKFSYRSRVRPCVV  
YGGADIGQQIRD LER GCHLLVATPGRLVDMMERGKIGLDFCKYLVLDEADRMLDMGFEPQ  
IRRIVEQDTMPPKGVRHTMMFSATFPKEIQMLARDFLDEYIFLAVGRV GSTSENITQKVV  
WVEESDKRSFLDLLNATGKDSLTLVFVETKKGADSL EFLYHEGYACTSIHGDRSQRDR  
EEALHQFRSGKSPILVATAVAARGLDISNVKHVINFDLPSDIEEYVHRIGRTGRVGNLGL  
ATSFNERNINITKDLLLVEAKQEVPSWLENMAYEHYKGS SRGRSKSSRFSGGFGAR

DYRQSSGASSSSFSRRASSRSRSGGGHGSRRGFGGGGYGGFYNSDGYGGNYNSQGVDDWW  
GN

>sp|Q86XP3|DDX42\_HUMAN ATP-dependent RNA helicase DDX42 OS=Homo sapiens  
GN=DDX42 PE=1 SV=1 Site of Methylarginine:12, 814, 875

MNWNKGGPGTKRFGFGGFAISAGKKEEPKLPQQSHSAFGATSSSSGFGKSAPPQLPSFY  
KIGSKRANFDEENAYFEDEEEDSSNVDPYIPAENSPTRQQFHSPVDSDDDDPLEAFM  
AEVEDQAARDMKRLEEKDKERKNVKGIRDDIEEEDDQEAYFRYMAENPTAGVVQEEEDN  
LEYSDGNPIAPTKKIIDPLPIDHSEIDYPPFEKNFYNEHEEITNLTPQQQLIDLRHKLN  
LRVSGAAPP RP GSSFAHFGFDEQLMHQIRKSEYTQPTPIQCQGV PVALSGRDMIGIAKTG  
SGKTAAFIWPMLIHIMDQKELEPGDGPIAVIVCPTRELCQQIHAECKRFGKAYNLRVAV  
YGGGSMWEQAKALQEGAEIVVCTPGRLLIDHVKKKATNLQRVSYLVFDEADRMFDMGFQYQ  
VRSIASHVRPDRQTLFSAFTRKKIEKLARDILIDPIRVVQGDIGEANEDVTQIVEILHS  
GPSKWNWLRRLVEFTSSGVLVFTVTKANAEEELANNLKQEGHNLGLLHGDMDSERNKV  
ISDFKKKIDIPVLVATDVAARGLDIPSIKTVINYDVARIDTHTHRIGRTGRAGEKGVAYT  
LLTPKDSNFAGDLVRNLEGANQHVSKELLDLAMQNAWFRKSRFKGGKGGKLNIGGGGLGY  
RERPLGSENMDRGNVMSNYEAYKPSTGAMGDRLTAMKAAFQSQYKSHFVAASLSNQK  
AGSSAAGASGWSAGSLNSVPTNSAQQGHNSPDSPTVSAAKGIPGFGNTGNISGAPVTYP  
SAGAQQVNNTASGNSREGTGGSNKRERYTENRGSSRHSGETGNRHS DSPRHGDGGRH  
GDGYRHP ESSSRHTDGRHRGENRHGGSAGRHRGENRGANDGRNGESRKEAFNRESKMEPKM  
EPKVDSSKMDKVDSKTDKTADGFAVPEPPKRKRSRWS

>sp|Q8IVS2|FABD\_HUMAN Malonyl-CoA-acyl carrier protein transacylase,  
mitochondrial OS=Homo sapiens GN=MCAT PE=1 SV=2 Site of  
Methylarginine:79, 86, 340

MSVRVARVAWVRGLGASYRRGASSFPVPPPGAQGVAE LLRDATGAE EEPWAATERRMPG  
QCSVLLFPQGQSQVVMGRGLLNYPVRELYAAARRVLGYDLLELSLHGPQETLDRTVHC  
QPAIFVASLAAVEKLHHLQPSVIENCVAAGFSVGEFAALVFAGAMEFAEGLYAVKIRAE  
AMQEASEAVPSGMLSVLQGPQSKFNFACLEAREHCKSLGIENPVCEVSNYLPDCRVISG  
HQEALRFLQKNSKFFHRTRMLPVSGAFHTRLM E PAVEPLTQALKAVDIKKPLVSVYSN  
VHAHRYRHPGHIHKLAAQQLVSPVKWEQTMHAIYERKKGRGFPQTFEVGPGRQLGAILKS  
CNMQAWKSYS AVDVLQTL EHVLDLPQEPPR

>sp|Q8WUA2|PPIL4\_HUMAN Peptidyl-prolyl cis-trans isomerase-like 4 OS=Homo  
sapiens GN=PPIL4 PE=1 SV=1 Site of Methylarginine: 435, 437, 443

MAVLETTGLGDVVIDLYTEERPRACLNFLKLCIKIYNYCLIHNVQRDFIIQTGDPTGTG  
RGGESIFGQLYGDQASFFAEKVPRIKHKKGTVMVNNGSDQHGSQFLITTGENDYLD  
GVHTVFGEVTEGMDI IKKINETFVDKDFVPYQDIRINH TVILDDPFDDPPDLLIPDRSPE  
PTREQLD SGRIGADEEIDDFKGRSAEEVEEIKAEKEAKTQAILLEMVGDLPDADIKPPEN  
VLFVCKLNPVTTDELEIIFSRFGPIRSCEVIRDWKTGESLCYAFIEFEKEEDCEKAFFK  
MDNVLIDRRRIHVDFSQSVAKVKWKGKGGKYTKSDFKEYEKEQDKPPNLVLDKVKPKQD  
TKYDLILDEQAEDSKSSHSHTSKKHKKTHHCSEEKEDDYMPIKNTNQDIYREMGFGHY  
EEEEESCWEKQKSEKRDRTQNRSRSRERDGHYSNSHKSKYQTDLYERERSKKRDRSRSP  
KSKDKESKYR

>sp|P49247|RPIA\_HUMAN Ribose-5-phosphate isomerase OS=Homo sapiens GN=RPIA PE=1  
SV=3 Site of Methylarginine:21, 42, 46, 52

MQRPGPFSTLYGRVLAPLPGRAGGAASGGGNSWDLPGSHVRLPGRAQSGTRGGAGNTST

SCGDSNSICPAPSTMSKAEAKKLAGRAAVENHVRNNQVLGIGSGSTIVHAVQRIAERVK  
QENLNLVCIPTSFQARQLILQYGLTSLDLRHPIDLAIDGADEVADLNLIKGGGGCLT  
QEKIVAGYASRFIVIADFRKDSKNLGDQWHKGIPIEVIPMAYVPSRAVSQKFGGVVELR  
MAVNKAGPVVTDNGNFILDWKFDRVHKWSEVNTAIKMIPGVVDTGLFINMAERVYFGMQD  
GSVNMREKPFPC

>sp|Q9BYN0|SRXN1\_HUMAN Sulfiredoxin-1 OS=Homo sapiens GN=SRXN1 PE=1 SV=2 Site  
of Methylarginine:11,16

MGLRAGGTLGRAGAGRGAPEGPGPSGGAQGGSIHSGRIAAVHNVPLSVLIRPLPSVLDPA  
KVQSLVDTIREDPDSVPPIDVLWIKGAQGGDYFYSFGGCHRYAAYQQLQRETIPAKLVQS  
TSLDLRVYLGASTPDLQ

>sp|Q9H2U1|DHX36\_HUMAN ATP-dependent RNA helicase DHX36 OS=Homo sapiens  
GN=DHX36 PE=1 SV=2 Site of Methylarginine:47,50,52

MSYDYHQNWGRDGGPRSSGGYGGPAGGHGGRGSGGGGGGGGRGGRGRHPGHLKGR  
EIGMWYAKKQGGKNEAERQERAVVHMDERREEQIVQLLSVQAKNDKESEAQISWFAPE  
DHGYGTEVSTKNTPCSENKLDIQEKKLINQEKKMFRIRNRSYIDRDSEYLLQENEPDGL  
DQKLEEDLQKKKNDLRYIEMQHFREKLPSYGMQKELVNLIDNHQVTVISGETGCGKTTQV  
TQFILDNYIERGKGSACRIVCTQPRRISAISSVAERVAERAESCGSGNSTGYQIRLQSRL  
PRKQGSILYCTTGIILQWLQSDPYLSSVSHIVLDEIHERNLQSDVLMTVVKDLLNFRSDL  
KVILMSATLNAEFSEYFGNCPMIHIPGFTFPVVEYLLEDVIEKIRYVPEQKEHRSQFKR  
GFMQGHVNRQEKEEKEAIYKERWPDYVRELRRRYSASTVDVIEMEDDKVDLNLIVALIR  
YIVLEEEDGAILVFLPGWDNISTLHDLMSQVMFKSDKFLIPLHSLMPTVNQTQVFKRT  
PPGVRKIVIATNIAETSITIDDVVYVIDGGKIKETHFDTQNNISTMSAEVWSKANAKQRK  
GRAGRVPQGHCHLYNGLRASLLDDYQLPEILRTPLEELCLQIKILRLGGIAYFLSRLMD  
PPSNEAVLLSIRHLMELNALDKQEELTPLGVHLARLPVEPHIGKMILFGALFCCLDPVLT  
IAASLSFKDPFV IPLGKEKIADARRKELAKDTRSDHLTVVNAFEGWEEARRRGFRYEKDY  
CWEYFLSSNTLQMLHNMKGQFAEHLGAGFVSSRNPKDPESNINSNEKIIKAVICAGLY  
PKVAKIRLNLGKKRKMVKVYTKDGLVAVHPKSVNVEQTFHYNWL IYHLKMRSSYLY  
DCTEVSPYCLFFGGDISIQKDNQETIAVDEWIVFQSPARIAHLVKELRKELDILLQEK  
IESPHVDWNTKSRDCAVLSAII DLIKTQEKATPRNFPFRFQDGYYS

>sp|Q9P258|RCC2\_HUMAN Protein RCC2 OS=Homo sapiens GN=RCC2 PE=1 SV=2  
Site of Methylarginine:26,28

MPRKAAAAAWEPPSSNGTARAGPRKRGGPAGRKRRPERCSSSSGGGSSGDEDGLELD  
GAPGGGKRAARPATAGKAGAAVVITEPEHTKERVKLEGSCKKGQLLIFGATNWDLIGRK  
EVPKQQAAYRNLGQNLWGPFRYGLAGVVRTVVSAGCAAHSLITTEGKLWSWGRNEKG  
QLGHGDTKRVEAPRLIEGLSHEVIVSAACGRNHTLAL TETGSVFAFGENKMGQLGLGNQT  
DAVPSPAQIMYNGQPITKMACGAEFMIMDCKGNLYSFGCPEYQQLGHNSDGKFIARAQR  
IEYDCELVPRRVAIFIEKTKDQILPVPNVVVRDVACGANHTLVLDSQKRVSFSGFGGYG  
RLGHAEQKDEMVPRLVKLDFPGRGASQIYAGYTCSFAVSEVGGFFWGATNTSRESTMY  
PKAVQDLCGWRIRSLACGKSSIIVA ADESTISWGPSPTFGELGYGDHKPKSSTAAQEVKT  
LDGIFSEQVAMGYSHSLVIARDESETEKEKIKKLPEYNPRTL

>sp|Q9BST9|RTKN\_HUMAN Rhotekin OS=Homo sapiens GN=RTKN PE=1 SV=2 Site of  
Methylarginine:9,14

MFSRNHRSRVTVARGSALEMEFKRGRFRLSLFSDLPEDTELQRKLDHEIRMREGACKLLA  
ACSQREQALEATKSLVCSNRILSYMDELQRRKEAQLGKTSRRPSDSGPPAERSPCRGR

VCISDLRIPLMWKDTEYFKNKGDLHRWAVFLLQLGHEIQDTEMILVDRTLTDISFQSNV  
LFAEAGPDFELRELEYGACVEEEGALTGGPKRLATKLSSSLGRSSGRRVRLSDSAGGSG  
SSPILLPTPVVGGPRYHLLAHTTLTAAVQDGFRTDHLTLASHEENPAWLPLYGSVCCRL  
AAQPLCMTQPTASGTLRVQQAGEMQNAQVHGVKGTNLCYRQPEDADTGEEPLLTIAV  
NKETRVRAGELDQALGRPFTLSISNQYGDDEVHTLQTESREALQSWMEALWQLFFDMSQ  
WKQCCDEIMKIETPAPRKPPQALAKQGSLYHEMAIEPLDDIAAVTDILTQREGARLETPP  
PWLAMFTDQPALNPCSPASVAPAPDWTPLPWGRPRTFSLDAVPPDHSPRARSVAPLPP  
QRSRTRGLCSKGQPRTWLQSPV

>sp|Q96FS4|SIP1\_HUMAN Signal-induced proliferation-associated protein 1

OS=Homo sapiens GN=SIP1 PE=1 SV=1 Site of Methylarginine:13,47

MPMWAGGVGSPRRGMAPASTDDLFAKLRQPARPPLTPHTFEPRPVRGPLLRSQSDAGEA  
RPPTPASPRARASHHEASRPAATSTRLFTDPLALLGLPAEEPEPAFPPVLEPRWFAHYD  
VQSLFDWAPRSQMGSHSEASSGTLASAEDAASSDLLHGAPGFVCELGGEGELGLGGP  
ASPPVPALPNAAVSILEEPQNRTSAYSLEHADLGAGYRKYFYGKEHQNFQMGDES LGP  
VAVSLRREEKEGSGGTLHSYRVIVRRTQLRTRLRGTISEDALPPGPPRGLSPRKLEHVA  
PQLSPSCLRLGSASPKVPRLLTLDEQVLSFQRKVGILYCRAQQSEEMYNQEAQPAF  
MQFLTLLGDVVRKGFESYRAQLDTKTDSTGTHSLYTTYQDHEIMFHVSTMLPYTPNNQQ  
QLLRKRHIGNDIVTIVFQEPGSKPFCPTTIRSHFQHVFLVRAHTPCTPHTTYRVAVSRT  
QDTPAFGPALPAGGGPFAANADFRAFLAKALNGEQAAGHARQFHAMATRTRQQYLQDLA  
TNEVTTLSDASRFGLPSLGGRRRAAPRPGAEQAAGSLVWGVRAAPGARVAAGAAS  
GPEGIEVPCLLGISAEALVLAAPRDGRVFNCAACRDVLAWTFSEQQLDLYHGRGEAITLR  
FDGSPGQAVGEVVARLQLVSRGCETRELALPRDQGRLGFEVDAEGFVTHVERFTAETA  
GLRPGARLLRVCGQTLPSLRPEAAAQLRSAPKVCVTVLPDESGRPRRSFSELYTSLQ  
EPSRRGAPDPVQDEVQGVTLPTTKQLLHLCLQDGGSPPGDLAEERTEFLHSQNSLSP  
RSSLSDEAPVLPNTTPDLLLATTAKPSVPSADSETPLTQDRPGSPSGSEDKGNPAPELRA  
SFLPRTLSLRNSISRIMSEAGSGTLEDEWQAISEIASTCNTILESLSREGQPIPESGDPK  
GTPKSDAEPEPGLSEKVSHLESMLRKLQEDLQKEKADRAALEEEVRSLRHNNRRLQAES  
ESAATRLLLASKQLGSPTADLA

>sp|P05423|RPC4\_HUMAN DNA-directed RNA polymerase III subunit RPC4 OS=Homo

sapiens GN=POLR3D PE=1 SV=2 Site of Methylarginine:95,97,99

MSEGNAAAGEPSTGGPRLLTGARGLIGRRPAPPLTPGRLPSIRSDTLGGVKKKTFTP  
NIISRKIKEEPKEEVTVKKEKREDRDRQREGHGRGRGRPEVIQSHSIFEQPAEMMKKK  
GNWDKTVDVSDMGPSHIINIKKEKRETDKQILRMLKDDFLDDPGLRNDTRNMPVQL  
PLAHSGWLFKEENDEPDVWPVLAGPKEEDMEVDIPAVKVKKEPRDEEEEAKMKAPKAAAR  
KTPGLPKDVSVAELLRELSLTKEEELLFLQLPDTLPGQPPTQDIKPIKTEVQGEDGQVVL  
IKQEKDREAKLAENACTLADLTEGQVQKLLIRKSGRVQLLLGKVTLDVDVTMGACSFQEL  
VSVGLGDSRTGEMTVLGHVHKHLVCSPDFESLLDHKHR

>sp|Q9UPN9|TRI33\_HUMAN E3 ubiquitin-protein ligase TRIM33 OS=Homo sapiens

GN=TRIM33 PE=1 SV=3 Site of Methylarginine:577,598,604

MAENKGGGEAESGGGSGSAPVTAGAAGPAAQEAEPPLTAVLVEEEEEEGRAGAEGGAA  
GPDDGGVAAASSGSAQAASSPAASVGTGAVAGVSTPAPAPASAPAGPSAGPPPAPPAS  
LLDTCVAVCQSLQSRREAEPKLLPCLHSFCLRCLPEPERQLSVPIPGGSNGDIQQVGVIR  
CPVCRQECRQIDLVDNYFVKDTSAPSSSDEKSEQVCTSCEDNASAVGFCVCEGEWLCKT  
CIEAHQRVKFTKDHILIRKKEDVSESVGASGQRPVFCPVHKQEQQLKFCETCDRLTCRDCQ



LLEHKEHRYQFLEEAFQNKGA IENLLAKLLEKKNYVHFAATQVQNR I KEVNETNKRVEQ  
EIKVAIFTLIN ENKKGKSL LQQL ENVTKERQMKLLQQQNDITGLSRQVKHVMNFTN WAI  
ASGSSTALLYSKRLITFQLRHILKARCDPVPAANGAIRFHCDPTFWAKNVVNLGNLVIES  
KPAPGYTPNVVVGQVPPGTNHISKTPGQINLAQLRLQHMQQVYAQKHQQLQQMRMQPP  
APVPTTTTTTQQHPRQAAPQMLQQQPPRLISVQTMQRGNMCCGAFQAHQMRLAQNAARIP  
GIPRHSGPQYSMMQPHLQRQHSNPGHAGPPVSVHNTTINPTSPTTATMANANRGPTSP  
SVTAIELIPSVTNPENLPSLPDIPPIQLEDAGSSSLDNLLSRYISGSHLPPQPTSTMNPS  
PGSALS PGSSGLSNSHTPVRPPSTSTGSRGSCGSSGR TAEKTSLSFKSDQVKVKEPG  
TEDEICSFSGGVKQEKTEDGRRSACMLSSPESSLTPPLSTNLHLESELDALASLENHVKI  
EPADMNESCKQSGLSSLVNGKSPIRSLMHSARIGGDGNNKDDDPNEDWCAVCQNGGDL  
CCEKCPKV FHLTCHVPTLLSFP SGDWICTFCRDI GKPEVEYDCDNLQHSKKGKTAQGLSP  
VDQRK CERLLL YCHELSIEFQEPVPASIPNYKI IKKPMDLSTVKKLQKKHSQHYQI  
PDDFVADVRLIFKNCERFNEMMKVVQVYADTQEINLKADSEVAQAGKAVALYFEDKLTEI  
YSDRTFAPLPEFEQEEDDGEVTEDESDEDFIQPRRKRLKSDERP VHIK

>sp|Q96CU9|FXRD1\_HUMAN FAD-dependent oxidoreductase domain-containing protein 1

OS=Homo sapiens GN=FOXRED1 PE=1 SV=2 Site of Methylarginine:12

MIRRVLP HGMGRLLTRRPGTRRGGFSLDWDGK VSEIKKKIKSILPGRSCDLLQDTS HLP  
PEHSDVVIVGGVGLGLSVAYWLK KLESRRGAIRVLVVERDHTYSQASTGLSVGGICQQFS  
LPENIQLSLFSASF LRNINEYLAVVDAPPLDLRFNPSGYLLLASEKDA AAMESNVKVRQ  
EGAKVSLMSPDQLRNKFPWINTEGVALASYGMEDEGWFDPWCLLQGLRRKVQSLGVLFCQ  
GEVTRFVSSQRMLTDDKAVLKR IHEVHVKMDRSLEYQPVECAIVINAAGAWSAQIAA  
LAGVGEGPPGTLQGTKLVEPRKRYVYVWHCPQGPLETPLVADTSGAYFRREGLGSNYL  
GGRSPTEQEEPDPANLEVDHDFQDKVWPHLALRVP AFETLKVQSAWAGYYDYNTFDQNG  
VVGPHPLVVNMYFATGFSGHGLQQAPGIGRAVAEMVLKGRFQTIDLS PFLFTRFYLGEKI  
QENNI

>sp|P52272|HNRPM\_HUMAN Heterogeneous nuclear ribonucleoprotein M OS=Homo

sapiens GN=HNRNPM PE=1 SV=3 Site of Methylarginine:60, 457

MAAGVEAAA EVAATEIKMEESGAPG VPSGNGAPGPKGEGERPAQNEKRKEKNIKRGGNR  
FEPYANPTKRYRAFITNIPFDVKWQSLKDLVKEKVG ETTYVELLMDAEGKSRGCAVVEFK  
MEESMKKAAEVLNKHSLSGRPLKVKEDPDGEHARRAMQKVMATTGGMGMGPGGPMITIP  
PSILNPNIPNEI IHALQAGRLGSTVFVANLDYKVGWKKLKEVFSMAGVVVRADILEDKD  
GKSRGIGTVTFEQSIEAVQAISM FNQQLLFD RPMHVKMDERALPKGDFP PPERPQQLPHG  
LGGIGMGLGPGGQP IDANHLNKGIGMGNIGPAGMMEGIGFGINKMGMMEGPFGGGMENM  
GRFGSGMNMGRINEILSNLKRGEIIAKQGGGGGG SVPGIERMGPIDRLGGAGMERMG  
AGLGHGMDRVGSEIERMGLVMDRMGSVERMGS GIERMGPLGLDHMASSIERMGQTMERIG  
SGVERMGAGMGFLERMAAPIDRVGQTIERMGS GVERMGPAIERMGLSMERMVPAGMGAG  
LERMGPVMDRMATGLERMGANNLERMGLERMGANS LERMGLERMGANS LERMGPAMGPAL  
GAGIERMGLAMGGGGASFDRAIEMERGNFGGSFAGSFGGAGGHAPGVARKACQIFVRNL  
PFDFTWKMLKDKFNECGHVLYADIKMENGSKGCGVVKFESPEVAERACRMNMGKLSGR  
EIDVRIDRNA

>sp|Q8WUM0|NUP133\_HUMAN Nuclear pore complex protein Nup133 OS=Homo sapiens

GN=NUP133 PE=1 SV=2 Site of Methylarginine:17, 54, 61

MFPAAPSPRTPGTGSRRGLAGLGPSTPRTASRKGLPLGS AVSSPVLFS PVGRRSSLSS  
RGTPTRMFP HHSITESVNYDVKTFGSSLPVKVMEALTLAEVDDQLTINIDEGGWACL VCK

EKLIIWKIALSPITKLSVCKELQLPPSDFHWSADLVALSYSSPSGEAHSTQAVAVMVATR  
EGSIRYWPSLAGEDTYTEAFVDSGGDKTYSFLTAVQGGSFILSSSGSQLIRLIPESGKI  
HQHILPQGGMLSGIGRKVSSFLGILSPSSDLTSSVLWDRERSSFYSLTSSNISKWELD  
DSSEKHAYSWDINRALKENITDAIWGSESNEYAIKEGVNIRYLDLKQNCGLVILAAAWH  
SADNPCLIIYSLITIEDNGCQMSDAVTVEVTQYNPPFQSEDLILCQLTVPNFSNQTAIYLY  
NESAVYVCSTGTGKFSLPQEKIVFNAQGDVSLGAGACGGVPIIFSRNSGLVSITSRENV  
ILAELEGSLASSVAGPNSEMIFFETTTKNETIAQEDKIKLLKAAFLQYCRKDLGHAQMV  
VDELFSSHSDLDSDSELDRAVTQISVDLMDDPASDPRWAESVPEEAPGFSNTSLIILHQ  
LEDKMKAHSLMDFIHQVGLFGRGSGFPVVRGTPMATRLLCEHAEKLSAAIVLKNHHSRL  
SDLVNTAILIALNKREYEIPSNLTPADVFFREVSQVDTICECLEHEEQVLRDAPMDSIE  
WAEVVINVNNILKMDLQAASHYRQNRNSLYRREESLEKEPEYVPTATSGPGGIRTVIIR  
QHEIVLKVAYPQADSNLRNIVTEQLVALIDCFLDGYVSQLKSVDKSSNRERYDNLEMEYL  
QKRSDLLSPLSLGQYLWAASLAEKYCDFDILVQMCQTDNQSRQLQRYMTQFADQNFSD  
LFRWYLEKGRKLLSQPISQHGQLANFLQAHEHLSWLHEINSQELEKAHATLLGLANME  
TRYFAKKKTLGLSKLAALASDFSEDMLQEKIEEMAEQERFLLHQETLPEQLLAEKQLNL  
SAMPVLTAPQLIGLYICEENRRANEYDFKKALDLEYYIDEEEDININDLKLEILCKALQR  
DNWSSSDGKDDPIEVSKDSIFVKILQKLLKDGILQSEYLPVVKDQLLQADQLGSLKSNPYF  
EFVLKANYEYVYVQGGI

>sp|Q9H6A9|PCX3\_HUMAN Pecanex-like protein 3 OS=Homo sapiens GN=PCNXL3 PE=1  
SV=2 Site of Methylarginine:274,702

MGSQVLQILRQGVWASLTGGWFFDPHQSTFNSCFHLYVWIFLLIFPFLLYMVLPPSLMVA  
GVYCLVVAVIFATIKTVNYRLHAMFDQGEIVEKRSSTMGELEEEPAQGDSNPPRDPGVEM  
TVFRKVSSTPPVRCSQHSVFGFNQVSELLPRMEDSGPLRDIKELVREQGSNNVIVTSAD  
REMLKLSQEKLIGDLPQTPPGAVPDPPLASTDSSEPSPLAGDGAPWSGSSMADTPMSPL  
LKGSLSQELSKSFLTLTQPDRALVRTSSRREQRRGAGGYQPLDRRGSGEPTPQKAGSSDS  
CFSGTDRETLSSFKSEKTNSTHLDSPGGPAPEGSDDTDPPEAEASPDPAGVPSDDTLR  
SFDTVIGAGTPPGAELLVVRPKDLALLRPSKRQPPLRRHSPPGRAPRRPLLEGGGFFE  
DEDTSEGSELPASSLRSQRRYSTDSSSSTSCYSPSSRGAAGGPRKRRAPHGAEETAV  
PPKRPYGTQRTPTASAKTHARVLSMDGAGGDVLRPPLAGCKAELEAQVGEQAASEPVV  
LPAEARRGPAANQPGWRGELQEEGAVGAAEETGRRDRSSSVRRTQAI RRRHNAGSNPTP  
PASVMGSPSSLQEAQRGRAASHSRALTLPSALHFASSLLLTRAGANVHEACTFDDTSEG  
AVHYFYDESGVRRSYTFGLAGGGYENPVGQQGEQTANGAWDRHSHSSSFHSADVPEATGG  
LNLQPRPVVLQGMQVRRVPLEIPEEQTLMEEAPPRAQHSYKYWLLPGRWTSVRYERLAL  
LALLDRTRGVLENIFGVGLSSLVAFLGYLLLLKGFFTDIWVWFQCLV IASCQYSLKSVQ  
PDAASPMHGHNVIAYSRPVYFCICLLIWLLDALGSAQPFPPVSLYGLTLFSASFFCA  
RDVATVFTLCFPFVLLGLLPQVNTCLMYLLEQIDMHGFGGTAATSPLTAVFSLSRSLLA  
AALLYGFCLGAIKTPWPEQHPVPLFSVFCGLLVALSYHLSRQSSDPTVLWLSIRSKLFPE  
LEERSLETARAEPDPLPKMRQSVREVLHSDLVMCVVI AVLTF AISASTVFIALKSVLG  
FVLYALAGAVGFFTHYLLPQLRKQLPWFCLSQPVLPLEYSQYEVGAAQVMWFEKLYAG  
LQCVEKYLIIYAVVNLALTVAHTVVSHPDKYCFYCRALLMTVAGLKLLRSAFCCPPQY  
LTLAFTVLLFHFDPRLSQGFLLDYFLMSLLCSKLWDLLYKLRVFLTYIAPWQITWGSF  
HAFAPFAVPHSAMLVQALLSGLFSTPLNPLLGSVAVFIMSYARPLKFWERDYNTRKVDH  
SNRLVTLQDRNPGADDNNLSIFYEHLTRSLQHTLCGDLVLRGWGNYGPGDCFLVASY  
LNALVHLIEVGNGLVTFQLRGLFRGTYCQQRVEAITEGVEEDEGCCCEPGLPRVLS

FNAAFGQRWLAW EVTASKYVLEGYSISDNNAASMLQVFDLRKILITYYVKSIIYYVSRSP  
KLEVLWSHEGITAALRPVVRPGYADSDPTFSLSVDEYDLRLSGLSLPSFCVHLEWIQY  
CASRRSQPVDQDWSPLVTLFCFLCVLGRRALGTASHSMSASLEPFLYGLHALFKGDFRI  
TSPRDEWVFADMDLLHRVAVPGVVRMALKLHQDHFTSPDEYEEPAALYDAIAANEERLVIS  
HEGDPAWSAILSNTPSLLALRHVLDASDEYKIIMLNRRLSFRV IKNRECVRGLWAG  
QQQELVFLRNRNPERGSIQNAKQALRNMINSSCDQPLGYPIYVSPLTTSLAGSHPQLRAL  
WGGPISLGAIAHWLLRTWERLHKGCGAGCNSGGNVDDSDCSGGGGLTSLSNPPVAHPTP  
ENTAGNGDQPLPPGPGWGRSSLSGSGDGRPPPLQWPPPRLPGPPASPIPTGPRTSR  
PPGPGLSSEGPSKWSLGGKGLGGSDGEPASGSPKGGTPKSQAPLDLSLSLSLSPD  
VSTEASPPRASQDIPCLDSSAPESGTPMGALGDWPAPIEERESPAAPLLEHQY

>sp|Q96PU8|QKI\_HUMAN Protein quaking OS=Homo sapiens GN=QKI PE=1 SV=1 Site of  
Methylarginine:227, 242

MVGEMETKEKPKPTDYLMQLMNDKMLSSLPNFCGIFNHLERLLDEEISRVKDMYNDT  
LNGSTEKRSaelPDAVGPVQLQEKLVPVKEYPDFNFVGRILGPRGLTAKQLEAETGCK  
IMVRGKSMRDKKKEEQNRGKPNWEHLNEDLHVLITVEDAQNRAEIKLKRAVEEVKLLV  
PAAEGEDSLKMQMELAILNGTYRDANIKSPALAFSLAATAQAAPRIITGPAPVLPAA  
LRTPTAGPTIMPLIRIQITAVMPNGTPHTAAIVPPGPEAGLIYTPYEYPTLAPATSI  
LEYPIEPSGVLGAVATKVRHDMRVHPYQRIVTADRAATGN

>sp|Q13454|TUSC3\_HUMAN Tumor suppressor candidate 3 OS=Homo sapiens GN=TUSC3  
PE=1 SV=1 Site of Methylarginine:63, 67

MGARGAPSRRRQAGRRLRYLPTGSFPFLLLLLLCCIQLGGGQKKKENLLAEKVEQLMEWS  
SRRSIFRMNGDKFRFKIKAPPRNYSMIVMFTALQPQRQCSVCRQANEYQILANSWRYSS  
AFCNKLFFSMVDYDEGTDVFFQQLNMNSAPTFMHFPKGRPKRADTFDLQRIGFAAEQLAK  
WIADRTDVHIRVFRPPNYSGTIALALLVSLVGGLLYLRRNLEFTYKNGWAMVSLCIVF  
AMTSGQMWNHIRPPYAHKNPHNGQVSYIHGSSQAQFVAESHIILVLNAAITMGMVLLNE  
AATSKGDVGKRRIIICLVGLGLVFFFSFLLSIFRSKYHGYPSDLDFE

### 50 proteins with 52 methylated lysine sites:

>tr|D3ZAZ5|D3ZAZ5\_RAT Breast cancer anti-estrogen resistance 3 OS=Rattus  
norvegicus GN=Bear3 PE=4 SV=1 Site of Methyllysine:334

MAAGKFASLPRHMPVNHQFPLASSMDLLSSKSPLAHRTEAYPDVSIHGTLPRKKKGPPP  
IRSCDSASHMGTLPHSKSPRQSSPLTQDLILEKPLPDWKGDSFAFRDPYLLDPTLEYVKF  
SKERHIMDRTPERLKKLEEEELLSSEDLRSHAWYHGRIPRQVSENLVQRDGFVLRDLSL  
SSPGNFVLTQWKNLAQHFKINRTVLRLEAYSRVQYQFEMESFDSIPGLVRCYVGNRRP  
ISQQSGAIIFQPINRTVPLWCLEERYGTSPGRGREGSFAEGRPDVVKRSLTTGGIQARD  
HSLPRGNLLRNKDKSGSQPAQLDHVQDRKAATLKAHQSESHLPIGCKLPPQSPSVDTSPC  
PNSPVFRTGSEPTLSPALVRRFSSDARAGEALRGSDSQLCPKPPPKPCKVPFLKVPSPS  
PWLNSEANYCELNPAFVGC DRGAKLLSQALDSHEMLLTAKQNGASGPRNSGINYSILDG  
DDQGRHWDPLAVQTDEGQEDETKFVPPVMEVTVSSFRPNDFESKLLPENKPLETAMKHA  
KELFTNH DARVIAQHMLSVDCVKARILEVSEDMKRSMGVSSGLELITLPHGRQLRLDIE  
RHNTMAIGIAVDILGCTGTLENRAGTLNKIIQVAMELKDTMGDLYSFSAIMKALEMPQIT  
RLEKTWTALRHHTQTATILYEKQLKPFKILHEGRESTYVPASSVSVPLLMPLVTLMERQ  
AVTFEGTDMWEKNDESCIEIMLSHLATARFMAEASESYRMAERVLADFQPDDEEMTEILKT  
EFQMRLWGSKGAEVNQNERDYKFNQILTALSRKLEPPSGKQAEI

>tr|A7E2C5|A7E2C5\_HUMAN BZRAP1 protein OS=Homo sapiens GN=BZRAP1 PE=2 SV=1 Site of Methyllysine:174

MEQLTTLPRPGDPGAMEPWALPTWHSWTPGRGGEPSSAAPSIADTPPAALQLQELRSEES  
SKPKGDGSSRPVGGTDPGAEACLPSLGQQASSSGPACQRPEDDEEVEAFLKAKLNMSFGD  
RPNLELLRALGELRQRCAILKEENQMLRKSSFPETEEKVRRLLKRKNAELAVIAKRLEERA  
RKLQETNLRVEGPQWLHVRFDRLLRESQREVLRLQRQIALRNQRETLPLPPSWPPGPAL  
QARAGAPAGGAEATPQEDADNLPVILGEPEKEQRVQQLSELSKKRKKCESLEQEARK  
KQRRCEELELQLRQAQENARLVEENSRLSGRATEKEQVEWENAELRGQLLGVGTQERDSA  
LRKSQGLQSKLESLEQVLKHMREVAQRRQQLVEHEQARLSLREKQEEVRRLLQQAQAEAQ  
REHEGAVQLLESTLDSMQARVRELEEQRCSQTEQFSLLAQELQAFRLHPGPLDLLTSALD  
CGSLGDCPPPPCCCSIPQPCRGSQPKDLDLPPGSPGRCTPKSSEPAPATLTGVPRRTAKK  
AESLSNSSHSES IHNSPKSCPTPEVDTASEVEELEADSVSLLPAAPEGSRGGARIQVFLA  
RYSYFPFEGPNENPEAELPLTAGEYIYIYGNMDEDGFFEGELMDGRRGLVPSNFVERVSD  
DDLLTSLPPELADLSHSSGPELSFLSVGGGGSSGGQSSVGRSQPRPEEDAGDELSLSP  
SPEGLGEPVAVPYPRRLVVLKQLAHSVVLAWEPPELHGFHICVNGELRQALGPGAP  
PKAVLENLDLRAGPLHISVQALTSRGSSDPLRCCLAGARAGVVPSQLRVHRLTATSAEI  
TWVPGNSNLAHAIYLNGECCPPASPSTYWATFCHLRPGTPYQAQVEAQLPPQGPWEPGWE  
RLEQRAATLQFTTLPAGPPDAPLDVQIEPGSPGILIIISWLPVTIDAAGTSNGVVRTGYA  
IYADGGKIMEVASPTAGSVLVELSQLQLLQVCREVVVRTMSPHGESADSIPAPITPALAP  
ASLPARVSCSPHPSPEARAPLASASPGGDPSSPLQLPAPLGTQEPGAPPASPSREMP  
KGSHEPAPPCSQEEAGAVLGTSEERTASTSTLGEKDPGAAPSLAKQEAEWAGEACP  
ASSSTQARAQQAPNTEMCQGGDPGSLRPRAEKEDTAELGVHLVNSLVDHGRNSDLSDI  
QEEEEEEEEEEEEELGSRTCSFQKQVAGNSIRENGAKSQDPFCETDSDEEILEQILELP  
LQQFCSKKLFSPPEEEEEEEEEDEEEKSGAGCSSRDPGPPEPALLGLGCDGQPRRPGQC  
PLSPESSRAGDCLEDMPGLVGGSSRRRGGGSPEKPPSRRRPPDPREHCSRLSNNGPQAS  
GRLGPTRERGGLPVIEGPRTGLEASGRGRLGPSRRCRGRALPGLASCLSPKCLEISIE  
YDSEDEQEAGSGGISITSSCPGDGEAWGTATVGRPRGPPKANSQKPYPRLPWEKGE  
ERRGRSATGRAKEPLSRATETGEARGQDGSRRGPQKRGVRLRPSTAEVLPARSPSETL  
AYQHLPVRIFFVALFDYDPVMSPNPDAGEEELPFREGQILKVFGDKDADGFYQEGGGRT  
GYIPCNMVAEAVDSPAGRQQLLQRGYLSPDILLEGSGNGPFVYSTARTTGPVPPKPRRSK  
KAESEGPAQPCGPPKLVPSADLKAPHSMVAAFDYNPQESSNMDVEAELPFRAGDVITV  
FGGMDDDGFYYGELNGRGLVPSNFLEGPPEAGGLDREPRTPQAESQRTRRRRVQC

>sp|Q70E73|RAPH1\_HUMAN Ras-associated and pleckstrin homology domains-  
containing protein 1 OS=Homo sapiens GN=RAPH1 PE=1 SV=3 Site of  
Methyllysine:134

MEQLSDEEIDHGAEEEDSKEDQDLDKMFGAWLGELDKLTQSLDSDKPMPEVKRSPLRQET  
NMANFSYRFSIYNLNEALNQGETVDLDALMADLCSIEQELSSIGSGNSKRQITETKATQK  
LPVSRHTLKHGTLKGLSSSSNRIAKPSHASYSLLDDVTAQLEQASLSMDEAAQQSVLEDTK  
PLVTNQHRRTASAGTVSDAEVHSISNSSHSSITSAASSMDSLIDKVTRPQELDLTHQGG  
PITEEEQAALKKAEKIRVALEKIKEAQVKKLVIRVHMSDDSSKTMVDERQTVRQVLDNL  
MDKSHCGYSLDWSLVETVSELQMERIFEDHENLVENLLNWTRDSQNKLIEMERIEKYALF  
KNPQNYLLGKKETAEMADRNKEVLLIECFGSSVTVPEIEGVLWLKDDGKKSWKRYFLL  
RASGIYVYPKGAKAVSRDLVCFQLQDHVNVVYGGQDYRNKYKAPTCLVLPKHPQIQKKSQ  
YIKYLCDDVRTLHQWVNGIRIAKYGKQLYMNYQEAALKRTEASAYDWTSLSSSSIKSGSSS

SSIPESQSNHSNQSDSGVSDTQPAGHVRSQSISSVFSEAWKRGQTLEESSKARMESMNR  
PYTSLVPLSPQPKIVTPYASQSPPLPPPPPPPPPPPPPPPPPPPLPSQSAPSAGSA  
APMFVKYSTITRLQNASQHSALFKPPTPPVMSQSVKPKQILVPPNGVPPPPPPPPPT  
PGSAMAQLKPAPCAPSLPQFSAPPPPLKIHQVQHITQVAPPTPPPPPPIPAPLPPQAPPK  
PLVTIPAPTSTKTAVPVVTAAPPTTPPVPPAKKQPAFPASYIPSPPTPPVPVPPPTL  
PKQQSFCAKPPPSPLSPVPSVVKQIASQFPPPTTPAMESQPLKPVANVAPQSPPAVKA  
KPKWQSSIPVSPDFPPPPPESSLVFPPPPSPVPAPPPPPPTASPTPKSGSPGKKT  
SKTSSPGGKPPPTPQRNSSIKSSSGAEHPEPKRPSVDSLVSFKTPPAESGSPSKETLPP  
PAAPPKPGKLNLSGVLNPGVLQQGCVSAKAPVLSGRGKDSVVEFPSPPSDSDFPPPPPET  
ELPLPPIEIPAVFSGNTSPKVAVVPNPQQWQWSKMSVKKAPPPTRPKRNDSTRLTQAEISE  
QPTMATVVPQVPTSPKSSLSVQPGFLADLNRTLQRKSI TRHGLSSRMSRAEPTATMDDM  
ALPPPPPELLSDQQKAGYGGSHISGYATLRRGPPAPPKRDQNTKLSRDW

>sp|Q6R327|RICTR\_HUMAN Rapamycin-insensitive companion of mTOR OS=Homo sapiens  
GN=RICTOR PE=1 SV=1 Site of Methyllysine:1367

MAAIGRGRSLKNLRVGRNDSGEENVPLDLTREPSDNLREILQNVARLQGVSNMRKLGHL  
NNFTKLLCDIGHSEEKLGPHYEDI IICLRLALLNEAKEVRAAGLRALRYLIQDSSILQKV  
LKLKVDYLIARCIDIQQSNEVERTQALRLVRKMITVNASLFPSSVTNSLI AVGNDGLQER  
DRMVRACIAIICELALQNPVVALRGGLNTILKNVIDCQLSRINEALITTLHLLNHPKT  
RQYVRADVELERILAPYTDHFYRHSPDTAEGQLKEDREARFLASKMGIATFRSWAGIIN  
LCKPGNSGIQSLIGVLCIPNMEIRRGLLEVLYDIFRLPLPVVTEEFIEALLSVDPGRFQD  
SWRLSDGFVAEAKTILPHRARSRPDLMDNYLALILSAFIRNGLLEGLVEVITNSDDHIS  
VRATILLGELLHMANTILPHSHSHLHCLPTLMNMAASFDIPKEKRLRASAALNCLKRFH  
EMKRRGPKPYSLHLDHI IQKAIATHQKRDQYLRVQKDFILKDT EEALLINLRDSQVLQH  
KENLEWNWNLIGTILKWPVNLRNKDEQLHRFVRRLYFYKPKSKLYANLDDLDFAKAKQ  
LTVVGCQFTEFLLESEEDGGYLEDLVKDIVQWLNASSGMKPERSLQNNGLTTLSQHYP  
LFIGTLSCHPHGVKMLEKCSVFQCLLNLCSLKNQDHLKLTVSSLDYSRDGLARVILSKI  
LTAATDACRLYATKHLRVLLRANVEFFNNGI ELLVTQLHDKNKTI SSEALDILDEACED  
KANLHALIQMKPALSHLGDKGLLLLLRFLSIPKGFSYLNERGYVAKQLEKWHREYNSKYV  
DLIEEQLNEALTYRKVPVDGNYVRRSNQRLQRPHVYLP IHLYGQLVHHKTGCHLLEVQN  
IITELCRNV RTPDLKWEIEKKLKASLWALGNIGSSNWGLNLLQEENVIPDILKLAQCE  
VLSIRGTCVYVGLIAKTKQGC DILKCHNWDVHRSRKHLWPVVPDDVEQLCNELSSIPS  
TSLNSESTSSRHNSESESVSSMFILEDDRFSSSTSTFFLDINEDTEPTFYDRSGPIK  
DKNSFPFFASSKLVKNRILNSLTPNKKHRSSSDPKGGKLSSESKTSNRRIRTLTEPSVD  
FNHSDDFTPISTVQKTLQLETSFMGNKHIEDTGSTPSIGENDLKFTKNFGTENHRENTSR  
ERLVVESSTSSHMKIRSQSFNTDTTSGISSMSSSPSRET VGDATMTDTCGSMSTVVS  
TKTIKTSHYLTPQSNHLSLSKSNVSLVPPGSSHTLPRRAQSLKAPS IATIKSLADCNFS  
YTSSRDAFGYATLKRLLQQRMHPSLSHSEALASPAKDVLFDTITMKANSFESRLTPSRF  
MKALSYASLDKEDLLSPINQNTLQRSSSVRSMVSSATYGGSDDYIGLALPVDINDIFQVK  
DIPYFQTKNIPPHDDR GARAF AHDAGGLPSGTGGLVKNSFHLLRQQMSL TEIMNSIHSDA  
SLFLESTEDTGLQEHTDNC LYCVCI EILGFQPSNQLSAICSHSDFQDIPYSDWCEQTIH  
NPLEVVP SKFSGISGCS DGVSQEGSASSTKSTELLG VKTIPDDTPMCRILLRKEVLRV  
INLSSSVSTKCHETGLLTIKEKYPQTFDDICLYSEVSHLLSHCTFRLPCRRFIQELFQDV  
QFLQMHEEA EAVLATPPKQPIVD TSAES

>sp|Q9UEE9|CFDP1\_HUMAN Craniofacial development protein 1 OS=Homo sapiens

GN=CFDP1 PE=1 SV=1 Site of Methyllysine:219

MEEFDSEDFSTSEEDDYVPSGGEYSEDDVNELVKEDEVGEEQTQKTQGKKRKAQSIPA  
RKRQGGSLSEEEEEEDANSESEGSSEEDDAAEQEKIGSEDARKKKEDELWASFLND  
VGPKSKVPPSTQVKKGEETEETSSSKLLVKAEELEKPKETEKVKITKVFDFAGEEVRVTK  
EVDATSKEAKSFFKQNEKEKPQANVPSALPSLPAGSGLKRSSGMSSLLGKIGAKKQKMST  
LEKSKLDWESFKEEEEGIGEELAIHNRGKEGYIERKAFLDRVDHRQFEIERDLRLSKMKP

>sp|000515|LAD1\_HUMAN Ladinin-1 OS=Homo sapiens GN=LAD1 PE=1 SV=2 Site of  
Methyllysine:367

MAVSRKDWASLSLARQRTLEDEEEQERERRRRHRNLSSTTDEAPRLSQNGDRQASASE  
RLPSVEEAQVPLPPASKDEDEDIQSILRTRQERRRRQVVEAAQAPIQERLEAEEGRN  
SLSPVQATQKPLVSKKELEIPRRRLSREQRGPWALEEESLVGREPEERKKGVPEKSPVL  
EKSSMPKKTAPKSLVSDKTSISEKVLASEKTSLEKIAVSEKRNSEKKSVEKTSVSE  
KSLAPGMALGSGRRLVSEKASIFEKALASEKSPTADAKPAPKRATASEQPLAQEPPASGG  
SPATTKEQRGRALPGKNLPSLAKQGASDPPTVASRLPPVTLQVKIPSKEEADMSSPTQR  
TYSSSLKRSSPRTISFRMKPKKENSETTLTRSASMKLPDNTVKLGEKLERYHTAIRRS  
VKSRGLPCTELFVAPVGVASKRHLFEKELAGQSRAPASSRKENLRSGVVTSSLNLWIS  
RTQESGDQDPQEAQKASSATERTQWQKSDSSSLDAEV

>sp|Q66K74|MAP1S\_HUMAN Microtubule-associated protein 1S OS=Homo sapiens  
GN=MAP1S PE=1 SV=2 Site of Methyllysine:553

MAAVAGSGAAAAPSSLLLVGSEFGSPGLLTYVLEELERGIERSWDVDPGVCNLDEQLKVF  
VSRHSATFSSIVKGRSLHHRGDNLETLVLLNPSDKSLYDELNRLLLDPASHKLLVLGAP  
CLEETGELLQTTGGFSPHHFLQVLKDREIRDILATPPPVPPIILTITCPTFGDWAQLAP  
AVPGLQGALRLQLRLNPPAQLPNSEGLCEFLEYVAESLEPPSPFELLEPPPTSGGFLRLGR  
PCCYIFPGGLGDAFFAVNGFTVLVNGGSNPSSFWKLRHLDRVDAVLVTHPGADSLPG  
LNSLLRRKLAERSEVAAGGGSWDDRLRRLISPNLGVVFFNACEAASRLARGEDEAEALALS  
LLAQLGITPLPSRGPVPAKPTVLFKMGVGRLDYVHPPSAGAERTLASVCALLVWHP  
AGPGEKVVVRLFPGCTPPACLLDGLVRLQHLRFLREPVTQDLEGPGAESKESVGSRD  
SSKREGLLATHPRPGQERPVARKEPARAEAPRKEKEAKTPRELKKDPKPSVSRTPRE  
VRAASSVNLKKTNAQAAPKPRKAPSTSHSGFPPVANGPRSPSLRCGEASPPSAACGS  
PASQLVATPSLELGPYPAGEEKALELPLAASSIPRPRTPSPESHRSAPAESRSLSPSLR  
GGEAGPDASPTVTPTVTPSLPAEVGSPHSTEVDESLSVSFEQVLPSPAPTSEAGLSLP  
LRGPRARRSASPHVDLCLVSPCFEHRKAVPMAPAPASPGSSNDSSARSQERAGGLGAE  
ETPPTSVESESLPDLSDPVLAPGAADSDEDETEGFGVPRHDPLDPLKVPPLPDPSSI  
CMVDPEMLPPKTARQTENVSRTRKPLARPNRAAPKATPVAAAKTKGLAGDRASRPLS  
ARSEPSEKGRAPLSRKSSTPKATRGPSPGASSRPGVSATPPKSPVYLDLAYLPSGSSA  
HLVDEEFFQRVRLCYVISGQDQRKEEGMRAVLDAALLASKQHWRDLQVTLIPTFDSVAM  
HTWYAETHARHQALGITVLGNSMVMQDDAFAACKVEF

>sp|Q15942|ZYX\_HUMAN Zyxin OS=Homo sapiens GN=ZYX PE=1 SV=1 Site of  
Methyllysine:295

MAAPRPSAIVSVSAPAFYAPQKKFGPVVAPKPKVNPFRPGDSEPPAPGAQRAQMGRV  
GEIPPPPPEDFPLPPPLAGDGDAAEGALGGAFPPPPPIEESFPAPLEEEIFPSPPP  
PEEEGGPEAIPPPPQPREKVSSIDLEIDSLSSLLDDMTKNDPFKARVSSGYVPPPVATP  
FSSKSTKPAAGGTAPLPPWKSPPSSQLPQVPAPAQSQTFHVQPQPQPKPVQLHVQS  
QTQPVSLANTQPRGPPASSPAPAPKFSVTPKFTPVASKFSPGAPGGSGSQPNQKLGHP

ALSAGTGSPQPPSFTYAQQREKPRVQEKQHPVPPPAQNQNQVRSPGAPGPLTLKEVEELE  
QLTQQLMQDMEHPQRQNVAVNELCGRCHQPLARAQPAVRALGQLFHIACFTCHQCAQQLQ  
GQQFYSLGAPYCEGCTDTLEKNTCGEPITDRMLRATGKAYHPHCFTCVVCARPLEGT  
SFIVDQANRPHCPVDYHKQYAPRCSVCSEPIMPEPGRDETVRVVALDKNFHMCKYKCEDC  
GKPLSIEADDNGCFPLDGHVLCRKCHTARAQT

>sp|Q9NQS1|AVEN\_HUMAN Cell death regulator Aven OS=Homo sapiens GN=AVEN PE=1  
SV=1 Site of Methyllsine:230

MQAERGARGGRRRPGRGRPGGDRHSERPAAAAVARGGGGGGGGGGRRRGRGRGRGFR  
GARGGRGGGAPRGRSRREPGGWGAGASAPVEDDDSAETYGEENDEQGNYSKRKIVSNWDR  
YQDIEKEVNNESGESQRGTDFSVLLSSAGDSFSQFRFAEEKEWDSEASCPKQNSAFYVDS  
ELLVRLQELPLCLRLNVAELVQGTVPLEVPQVKPKRTDDGKGLGMQLKGPLPGGGRGP  
IFELKSVAAAGCPVLLGKDNPSGSRDSQKPTSPLQSAGDHLEELDLLLNLDAPIKEGD  
NILPDQTSQDLKSKEDGEVVQEEVCAKPSVTEKNMEPEQPSTSKNVTEEELEDWLDISM  
IS

>sp|P14625|ENPL\_HUMAN Endoplasmin OS=Homo sapiens GN=HSP90B1 PE=1 SV=1 Site of  
Methyllsine:663

MRALWVLGLCCVLLTFGSVRADDEVVDVGTVEEDLGKSREGSRTDDEVVQREEEAIQLDG  
LNASQIRELREKSEKFAFQAEVNRMMKLIINSLYKNKEIFLRELISNASDALDKIRLISL  
TDENALSGNEELTVKIKCDKEKNLLHVTDTGVGMTREELVKNLGTIAKSGTSEFLNKMT  
AQEDGGQSTSELIGQFVGFYS AFLVADKVI VTSKHNNDTQHIWESDSNEFSVIADPRGNT  
LGRGTTITLVLKEEASDYLELDTIKNLVKKYSQFINFPIYVWSSKTETVEEPMEEEEAAK  
EEKEESDDEAAVEEEEEKPKTKKVEKTVWDWELMNDIKPIWQRPSKEVEEDEYKAFYK  
SFSKESDDPMAYIHFTAEGEVTFKSI L FVPTSAPRGLFDEYGSKKS DYIKLYVRRVFTD  
DFHDMMPKYLNFVKGVVSDDLLPLNVSRETQQHKLKVI RKKLVKRTLDMIKKIADDKY  
NDTFWKEFGTNIKLGVI EDHSNRTRLAKLLRFQSSHPTDITSLDQYVERMKEKQDKIYF  
MAGSSRKEAESSPFVERLLKKGYEVIYLTEPVDEYCIQALPEFDGKRFQVNAKEGVKFDE  
SEKTKESREAVEKEFEPLLNWMDKALKDKIEKAVVSQRLTESPCALVASQYGSWGNMER  
IMKAQAYQTGKDISTNYASQKKTFEINPRHPLIRDMLRRIKEDDDKTVLDLAVVLFET  
ATLRSGYLLPDTKAYGDRIERMLRLSLNIDPDAKVEEPEEPEETAEDTTEDTEQDEDE  
EMDVGTDEEEETAKESTA EKDEL

>sp|Q8N163|CCAR2\_HUMAN Cell cycle and apoptosis regulator protein 2 OS=Homo  
sapiens GN=CCAR2 PE=1 SV=2 Site of Methyllsine:123

MSQFKRQRINPLPGRNFSGTASTSLLGPPPGLLTPPVATELSQNAHLLQGGEKQRVFTG  
IVTSLHDYFGVVDEEVFFQLSVVKGRLPQLGEKVLVKAAYNPGQAVPWNVAVKQVTLNQP  
LLKSPAPLLHVAALGQKQILGAQPQLIFQPHRIPPLFPQKPLSLFQTSHTLHLSHLNR  
FPARGPHGRLDQGRSDDYDSKKRKRQ RAGGEPWGAKKPRHDLPPYRVHLTPYTVDSPICDF  
LELQRRYRSLVPSDFLSVHLSWLSAFPLSQPFSLHHSRIQVSSEKEAAPDAGAEPITA  
DSDPAYSSKVL LSSPGL EELYRCCMLFVDDMAEPRETPEHPLKQIKFLLGRKEEEAVLV  
GGEWSPSLDGLDPQADPQVLVRTAIRCAQAQTGIDL SGCTKWWRF AEFQYLQPGPPRRLQ  
TVVVYLPDVWTIMPTLEWEALCQQKAAEAAPPTQEAQGETEPTEQAPDALEQAADTSRR  
NAETPEATTQETDIDLPEAPPPLEPAVIARPGCVNLSLHGIVEDRRPKERISFEVMVL  
AELFLEMLQRDFGYRVYKMLLSLPEKVVSPPEPEKEEAAKEEATKEEEAIKEEVVKEPKD  
EAQNEGPATESEAPLKEDGLLPKPLSSGGEEEEKPRGEASEDLCEMALDPELLLLRDDGE  
EEFAGAKLEDSEVRSVASNQSEMEFSSLQDMPKELDPSAVLPLDCLLAFVFFDANWCGYL

HRRDLERILLTLGIRLSAEQAKQLVSRVVTQNICQYRSLQYSRQEGLDGGLPEEVLFGNL  
DLLPPPGKSTKPGAAPTEHKALVSHNGSLINVGSLQRAEQQDSGRLYLENKIHTLELKL  
EESHNRFSATEVTNKTAAEMQELRVRLAEAEETARTAERQKSQLRLLQELRRRLTPLQ  
LEIQRVVEKADSWVEKEEPPAPSN

>sp|Q96JP5|ZFP91\_HUMAN E3 ubiquitin-protein ligase ZFP91 OS=Homo sapiens  
GN=ZFP91 PE=1 SV=1 Site of Methyllysine:174

MPGETEPRPPEQQDQEGGEAAKAAPEEPQQRPEAVAAAAPAGTTSSRVLRGGRDRGRAA  
AAAAAAVSRRRKAEYPRRRSSPSARPPDVPQQPQAAKSPSPVQKKSPLLCEKVT  
TDKDPKEEKEEEDSALPQEVSAASRPSRGWRSSRTSVSRHRDTENTRSSRSKTGSLQL  
ICKSEPNTDQLDYDVGEEHQSPGGISSEEEEEEEEMLISEEEIPFKDDPRDETYKPHLE  
RETPKPRRKSQKVEEKEKEIKVEVEVEVEKEEENEIREDEEPPRKRGRRRKDDKSPRLP  
KRRKKPPIQYVRCMEGCGTVLAHPRYLQHHIKYQHLLKKKYVCPHPSCGRLFRLQKQLL  
RHAKHHTDQRDYICEYCARAFKSSHNLAVHRMIHTGEKPLQCEICGFTCRQKASLNWHMK  
KHDADSFYQFSCNICGKKEFKDSVVAHKAKSHPEVLIAEALANAGALITSTDILGNP  
ESLTQPSDQGLPLLPEPLGNSTSGECLLLEAEGMSKSYCSGTERVSLMADGKIFVGS  
SGGTEGLVMNSDILGATTEVLIEDSDSAGP

>sp|Q9NVM6|DJC17\_HUMAN DnaJ homolog subfamily C member 17 OS=Homo sapiens  
GN=DNAJC17 PE=1 SV=1 Site of Methyllysine:264

MAVTKELLQMDLYALLGIEKAADKEVKKAYRQKALSCHPDKNPDNPRAAELFHQLSQAL  
EVLTDAAAARAAYDKVRKAKKQAAERTQKLEDEKRKKVKLDLEARERQAQAQSEEEEEESRS  
TRTLEQEIERLREEGSRQLEEQQRLIREQIRQERDQRLRGKAENTEGGTPKLLKWKCK  
KEDESKGGYSKDVLLRLLQKYGEVNLVLSKKPGTAVVEFATVAAELAVQNEVGLVDN  
PLKISWLEGGPQDAVGRSHSGLSKGSVLSERDYESLVMMRMRQAERQQLIARMQEDQE  
GPPT

>sp|P08238|HS90B\_HUMAN Heat shock protein HSP 90-beta OS=Homo sapiens  
GN=HSP90AB1 PE=1 SV=4 Site of Methyllysine:607

MPPEVHHGEEVETFAFQAEIAQLMSLIINTFYNSKEIFLRELISNASDALDKIRYESLT  
DPSKLDGKELKIDIIPNPQERTLTLVDTGIGMTKADLNNLGTIAKSGTKAFMEALQAG  
ADISMIGQFGVGFYSAYLVAEKVVVITKHNDDEQYAWESSAGGSFTVRADHGEP IGRGK  
VILHLKEDQTEYLEERRVKEVVKHSQFIGYPITLYLEKEREKEISDDEAEKEEKEE  
DKDDEEKPIEDVGSDEEDDSGDKKKKTKIKEKYIDQEELNKTPIWTRNPDDITQEE  
YGEFYKSLTNDWEDHLAVKHFVVEGQLEFRALLFIPRRAPFDLFENKKKNNIKLYVRRV  
FIMDSCDELIPEYLNFRGVVDEDLPLNISREMLQQSKILKVIKKNIVKKCLELFS  
EDKENYKFFYEAFSKNLKLGIHEDSTNRRRLSELLRYHTSQSGDEMTSLSEYVSRMKETQ  
KSIYYITGESKEQVANSFVERVRKRGFEVVMTEPIDEYCVQQLKEFDGKSLSVTKEG  
LELPEDEEKKKMEESKAKFENLCKLMEILDKKVEKVTISNRLVSSPCCIVTSTYGWTA  
NMERIMKAQALRDNSTMGYMAKKHLEINPDHPIVETLRQKAEADKNDKAVKDLVLLFE  
TALLSSGFSLEDPQTHSNRIYRMIKLGLGIDEDEVAEEPNAAVPDEIPPLEGDEDASRM  
EEVD

>sp|P34932|HSP74\_HUMAN Heat shock 70 kDa protein 4 OS=Homo sapiens GN=HSPA4  
PE=1 SV=4 Site of Methyllysine:773

MSVVGIDLGFQSCYVAVARAGGIETIANEYSDRCTPACISFGPKNRSIGAAAKSQVISNA  
KNTVQGFGRFHGRAFSDFVEAEKSNLAYDIVQLPTGLTGIKVTYMEERNFTTEQVTAM  
LLSKLKETAESVLKPKVVDVSVPCFYTDAERRSVMDATQIAGLNCLRLMNETTAVALA



YGIYKQDLPALEEKPRNVVFDVMGHSAYQVSVCAFNRGKLVLATAFDTTLGGKRFDEVL  
VNHFCSEFGKXYKLDIKSKIRALLRLSQCCEKLLKMSANASDLPLSIECFMNDVDVSGT  
MNRGKFLMECNDLLARVEPLRSVLEQTKLKKEDIYAVEIVGGATRIPAVKEKISKFFGK  
ELSTTLNADEAVTRGCALQCAILSPAFAKREFSITDVVPYPISLRWNSPAEEGSSDCEVF  
SKNHAAPFSKVLTFYRKEPFTLEAYYSSPQDLPYPDPAIAQFSVQKVTQSDGSSSKVKV  
KVRVNVHGFVSVSSASLVEVHKSEENEEMETDQNAKEEEKMQVDQEEPHVEEQQQQTPA  
ENKAESEEMETSQAGSKDKKMDQPPQAKKAKVKTSTVDLPIENQLLWQIDREMLNLYIEN  
EGKMIQDKLEKERNDAKNAVEEYVYEMRDKLSGEYEFVSEDDRNSFTLKLEDTENWLY  
EDGEDQPKQVYVDKLAELKNLGGPIKIRFQESEERPKLFEELGKQIQQYMKIISFKNKE  
DQYDHLDAADMTKVEKSTNEAMEWMNKNLQNKQSLTMDPVVKSKEIEAKIKELTSTCS  
PIISKPKPKVEPPKKEQKNAEQNGPVDGQDNPQPAAEQGTDTAVPSDSDKLPEDID  
>sp|P11021|GRP78\_HUMAN 78 kDa glucose-regulated protein OS=Homo sapiens  
GN=HSPA5 PE=1 SV=2 Site of Methyllysine: 591

MKLSLVAAMLLLLSAARAEEDKKEDVGTVVGIDLGTTYSCVGVFKNGRVEIIANDQGNR  
ITPSYVAFTPEGERLIGDAAKNQLTSNPENTVFDKRLIGRTWNDPSVQQDIKFLPFKVV  
EKKTTPYIQVDIGGGQTKTFAPEEISAMVLTMMKETAEAYLGKVVTHAVVTPAYFNDAQ  
RQATKDAGTIAGLNMRIINEPTAAAIAAYGLDKREGEKNILVFDLGGGTFDVSLLTIDNG  
VFEVVATNGDTHLGGEDFDQRVMEHFIKLYKKKTGKDVVRKDNRAVQKLRREVEKAKRALS  
SQHQARIEIESFYEGEDFSETLTRAKEELNMDLFRSTMKPVQKVLSDKLSIDEIV  
LVGGSTRIPKIQQLVKEFFNGKEPSRGINPDEAVAYGAAVQAGVLSGDQDTGDLVLLDVC  
PLTLGIETVGGVMTKLIIPRNTVPTKKSQIFSTASDNQPTVTIKVYEGERPLTKDNHLLG  
TFDLTGIPPAPRGVPQIEVTFEIDVNGILRVTAEDKGTGNKNKITITNDQNRLTPEEIER  
MVNDAEKFAEEDKKLKERIDTRNELESYAYSLKNQIGDKEKLGKLSSEDKETMEKAVEE  
KIEWLESHQDADIEDFKAKKKELEEIVQPIISKLYGSAGPPPTGEEDTAEKDEL

>sp|P11142|HSP7C\_HUMAN Heat shock cognate 71 kDa protein OS=Homo sapiens  
GN=HSPA8 PE=1 SV=1 Site of Methyllysine:557

MSKGPVAVGIDLGTTYSCVGVFHGKVEIIANDQGNRTTPSYVAFTDTERLIGDAAKNQVA  
MNPTNTVFDKRLIGRRFDDAVVQSDMKHWPFMVNDAGRPKVQVEYKGETKSFYPEEVS  
SMVLTKMKEIAEAYLGKTVTNAVVTVPAYFNDSQRQATKDAGTIAGLNLRIINEPTAAA  
IAAYGLDKKVAERNVLIIFDLGGGTFDVSILTIEDGIFEVVKSTAGDTHLGGEDFDNRMVNH  
FIAEFKRKHKKDISENKRAVRRRLTACERAKRTLSSSTQASIEIDSLYEGIDFYTSITRA  
RFEELNADLFRGTLDPVEKALRDAKLDKSQIHDIVLVGGSTRIPKIQKLLQDFNKGELN  
KSINPDEAVAYGAAVQAAILSGDKSENVQDLLLLDVTPLSLGIETAGGVMVLIKRNNTI  
PTKQTQFTTYSNQPGLIQVYEGERAMTKDNLLGKFELTGIPPAPRGVPQIEVTFDI  
DANGILNVSVDKSTGKENKITITNDKGRLSKEDIERMVQEAKEYKADEKQRDKVSSKN  
SLESYAFNMKATVEDEKLQKINDEDKQKILDKCNEIINWLDKNQTAKEKEEFHQKKELE  
KVCNPIITKLYQSAGGMPGGMPGGFPGGAPPSSGGASSGPTIEEVD

>sp|P50238|CRIP1\_HUMAN Cysteine-rich protein 1 OS=Homo sapiens GN=CRIP1 PE=1  
SV=3 Site of Methyllysine:64

MPKCPKCNKEVYFAERVTSLGKDWHRPCLCKECKGKTLTSGGHAEHEGKPYCNHPCYAAM  
FGPKGFGRGGAESHTEFK

>sp|P08107|HSP71\_HUMAN Heat shock 70 kDa protein 1A/1B OS=Homo sapiens  
GN=HSPA1A PE=1 SV=5 Site of Methyllysine:567

MAKAAAIGIDLGTTYSCVGVFHGKVEIIANDQGNRTTPSYVAFTDTERLIGDAAKNQVA

LNPQNTVFDKRLIGRKFQDPVQSDMKHWPQVINDGDKPKVQVSYKGETKAFYPPEEIS  
SMVLTKMKEIAEAYLGYPVTVNAVITVPAYFNDSQRQATKDAGVIAGLNVLRINEPTAAA  
IAYGLDRTGKGERNVLIFDLGGGTFDVSILTIDDGIFEVKATAGDTHLGGEDFDNRLVNH  
FVEEFKRKHKKDISQNKRAVRRRLTACERAKRTLSSSTQASLEIDSLFEGIDFYTSITRA  
RFEELCSDLFRSTLEPVEKALRDAKLDKAQIHDLVLVGGSTRIPKVQKLLQDFNGRDLN  
KSINPDEAVAYGAAVQAAIILMGDKSENVQDLLLLDVAPLSLGLTAGGVMTALIKRNSTI  
PTKQTQIFTTYSNQPQVLIQVYEGERAMTKDNLLGRFELSGIPPAPRGVPPQIEVTFDI  
DANGILNVTATDKSTGKANKITITNDKGRLSKEEIERMVQEAKEYKAEDVQRERVSANK  
ALESYAFNMKSAVEDEGLKGGISEADKKKVLKQCEVISWLDANTLAEKDEFEHKRKELE  
QVCNPIISGLYQGAGGPGGGFQAQGPKGGSGSGPTIEEVD

>sp|O60870|KIN17\_HUMAN DNA/RNA-binding protein KIN17 OS=Homo sapiens GN=KIN  
PE=1 SV=2 Site of Methyllysine:135

MGKSDFLTPKAIANRIKSKGLQKLRWYQMCQKQCRDENGFKCHCMSESHQRQLLASEN  
PQQFMDYFSEEFNRDLELLRRRFGTKRVHNNIVYNEYISHREHIHMNATQWETLTDFTK  
WLGREGLCKVDETPKGWYIQYIDRDPETIRRQLELEKQKQDLDEEKTAKFIEEQVRRG  
LEGKEQEVPTFTELSRENDEEKVTFNLSKGACSSGATSSKSSTLGPSALKTIGSSASVK  
RKESQSSTQSKKSSALDEIMEIEEEKRTARTDYWLQPEIIVKIIITKKLGEKYHK  
KKAIVKEVIDKYTAVVKMIDSGDKLKDQTHLETVIPAPGKRILVLNGGYRGNEGTLESI  
NEKTFSATIVIETGPLKRRVEGIQYEDISKLA

>sp|Q9P270|SLAI2\_HUMAN SLAIN motif-containing protein 2 OS=Homo sapiens  
GN=SLAIN2 PE=1 SV=2 Site of Methyllysine:553

MEDVNSNVNADQEVKRLQELVKKLEKQNEQLRSRSGAVQAGSLGPGSPVRAGASIPSSG  
AASPRGFPLGSAKSGGGPGSPRRTSSEELRDATSLAAGEGGLLDEVEPLRPDELERL  
SGWEEEEESWLYSSPKKLTQMKSVSPLVWCRQVLDYPSPDVECAKKSIIHKLDQTMSA  
LKRQNLNPNFNSMSYTSYSPNASSPYSSGFNSPSTPVRPPIVKQLILPGNSGNLKSS  
DRNPLSPQSSIDSELSASELDEDSIGSNYKLNVDVQILARMQEEESLRQEYAATTSRR  
SSGSSCNSTRRTFSDQELDAQSLDDEDDNMHHAVYPAVNRFSPPRNSPRPSPKQSPRN  
SPRSRSPARGIEYSRVSPQPMISRLQQPRLSLQGHPTDLQTSNVKNEEKLRSLPNLSRT  
SNTQVDSVKSSRSDSNFQVPPNGGIPRMQPQASAIIPSPGKFRSPAAPSPLALRQPVKAFSN  
HGSGSPGSQEITQLTQTSSPQPPMVQSTVSNPPSNINSATLTRPAGTTAMRSGLPRPS  
APSAGGIPVPRSKLAQPVRSLPAPKTYGSMKDDSWKDGCV

>sp|Q9Y657|SPIN1\_HUMAN Spindlin-1 OS=Homo sapiens GN=SPIN1 PE=1 SV=3 Site of  
Methyllysine:7

MKTPFGKTPGQRSRADAGHAGVSANMMKKRTSHKKHRSSVGPSPVSPRRNIVGCRIQH  
GWKEGNPVTQWKGTVLDQVPVNPSTLYLIKVDGFDCVYGLELNKDERVSALEVLPRVAT  
SRISDAHLADTMIGKAVEHMFETEDGSKDEWRGMVLARAPVMNTWFIITYEKDPVLYMYQ  
LLDDYKEGDLRIMPDSNDSPAAREPGEVDSLGVKQVEYAKEDGSKRTGMVIVHVEAKP  
SVYFIKFDFFFHIIYYDLVKTS

>sp|Q01518|CAP1\_HUMAN Adenyl cyclase-associated protein 1 OS=Homo sapiens  
GN=CAP1 PE=1 SV=5 Site of Methyllysine:287

MADMQNLVERLERAVGRLEAVSHTSDMHRGYADSPSKAGAAPYVQAFDSLLAGPVAEYLK  
ISKEIGGDVQKHAEMVHTGLKLERALLVTASQCQQAENKLSDLLAPISEIQIKEVITFRE  
KNRGSKLFNLSAVSESIQALGWVAMAPKPGPYVKEMNDAAMFYTNRVLKEYKDVKKHV  
DWWKAYLSIWTELQAYIKEFHHTGLAWSKTPVAKELSGLPSGPSAGSCPPPPPCPPPP

PVSTISCSYESASRSSLFAQINQGESITHALKHVSDDMKTHKNPALKAQSGPVRSGPKPF  
SAPKPQTSPSPKRATKKEPAVLELEGKKWRVENQENSVNLVIEDTELKQVAYIYKCVNTT  
LQIKGKINSITVDNCKLGLVFDVVGVIEI INSKDVKQVVMGKVPTISINKTDGCHAYL  
SKNSLDCEIVSAKSSEMNLIPTEGGDFNEFPVPEQFKTLWNGQKLVTTVTEIAG

>sp|Q15417|CNN3\_HUMAN Calponin-3 OS=Homo sapiens GN=CNN3 PE=1 SV=1 Site of  
Methyllysine:158

MTHFNKGPSYGLSAEVKMKIASKYDHQAEEDLRNWIEEVTGMSIGPNFQLGLKDGILCE  
LINKLQPGSVKKNVNESSLNWPQLENIGNFIKAIQAYGMKPHDIFEANDLFENGNMTQVQT  
TLVALAGLAKTKGFHTTIDIGVKYAEKQTRRFDEGKLGAGQSVIGLQMGTKNCASQAGMT  
AYGTRRHLYDPKMQTDPKPFQTTISLQMGTKNGASQAGMLAPGTRRDIYDQKLTLPVDN  
STISLQMGTKNVASQKGMVYGLGRQVYDPKYCAAPTEPVIHNGSQGTGTNGSEISDSY  
QAEYPDEYHGEYQDDYPRDYQYSDQGIDY

>sp|Q14847|LASP1\_HUMAN LIM and SH3 domain protein 1 OS=Homo sapiens GN=LASP1  
PE=1 SV=2 Site of Methyllysine:75

MNPNCARCGKIVYPTEKVNCLDKFVHKACFHCETCKMTLNMKNYKGYEKKPYCNAHYPKQ  
SFTMVADTPENLRKQSELQSQVRYKEEFKNGKGFVSVVADTPELQRIKKTQDQISNI  
KYHEEFKSRMGPSGGEMEPERRDSQDGSSYRRPLEQQQPHHIPTSAPVYQQPQQPVA  
QSYGGYKEPAAPVSIQRSAPGGGGKRYRAVDYSAADEDEVSFQDGDITVNVQQIDDGWM  
YGTVERTGDTGMLPANYVEAI

>sp|P27816|MAP4\_HUMAN Microtubule-associated protein 4 OS=Homo sapiens GN=MAP4  
PE=1 SV=3 Site of Methyllysine:809,1011

MADLSLADALTEPSPIEGEIKRDFIATLEAEAFDDVVGETVVGKTDYIPLLDVDEKTGNS  
ESKKKPCSETSQIEDTPSSKPTLLANGGHGVEGSDTTGSPTEFLEEKMAYQEYNSQNW  
EDTNFCFQPEQVVDPIQTDPFKMYHDDDLADLVFPSSATADTSIFAGQNDPLKDSYGMSP  
CNTAVVPQGWSVEALNSPHSEFVVSPEAVAEPPTAVPLELAKEIEMASEERPPAQA  
LEIMMGLKTTDMAPSKETEMALAKDMALATKTEVALAKDMESPTKLDVTLAKDMQPSMESDM  
ALVKDMELPTEKEVALVKDVRWPTETDVSSAKNVVLPTEVEVAPAKDVTLLKETERASPI  
KMDLAPSKDMGPPKENKETERASPIKMDLAPSKDMGPPKENKIVPAKDLVLLSEIEVAQ  
ANDIISSTEISSAEKVALSSETEVALARMTLPPETNVILTKDKALPLEAEVAPVKDMAQ  
LPETEIAPAKDVAPSTVKEVGLLKDMSPLESETEMALGKDVTPPETEVVLIKNVCLPPEM  
EVALTEDQVPALKTEAPLAKDGVTLANNVTPAKDVPLPSETATPVPKDMEDIAQTQKQ  
ISEDHLESLQDVGQSAAPTFMISPETVTGTGKKCSLPAEEDSVLEKLGKPCNSQPSE  
LSSETSGIARPEEGRPVVSGTNDITTPPNKELPPSPEKTKPLATTQPAKTSTSKAKTQ  
PTSLPKQAPPTTIGGLNKKPMSLASGLVPAAPPKRPVAVASARPSILPSKDVKPKPIADAK  
APEKRASPSKPASAPASRSGSKSTQTVAKTTTAAAVASTGPSSRSPSTLLPKKPTAIKTE  
GKPAEVKMTAKSVPADLSRPKSTSTSSMKTTTSLGTAPAAGVVPSRVKATPMPSRPST  
TPFIDKKPTSAPKSTTPRLSRLATNTSAPDLKNVRSKVGSTENIKHQPGGGRKVEKKT  
EAAATTRKPESNAVTKTAGPIASAQKQAPAGKVQIVSKKVSYSHIQSKCGSKDNIKHVPGG  
GNVQIQNKVDISKVSSKCGSKANIKHKPGGGDVKIESQKLNFKKAQAKVGSLDNVGHL  
PAGGAVKTEGGGSEAPLCPGPPAGEEPAISEAAPEAGAPTSASGLNGHPTLSGGGDQREA  
QTLDSQIQETSI

>sp|P16949|STMN1\_HUMAN Stathmin OS=Homo sapiens GN=STMN1 PE=1 SV=3 Site of  
Methyllysine:29

MASSDIQVKELEKRASGQAFELILSPRSKESVPEFPLSPPKKKDLSEETQKKLEAAEER

RKSHEAEVLKQLAEKREHEKEVLQKAIEENNNFSKMAEEKLTHKMEANKENREAQMAAKL  
ERLREKDKHIEEVRKNKESKDPADETead

>sp|Q9BX63|FANCI\_HUMAN Fanconi anemia group J protein OS=Homo sapiens GN=BRIP1  
PE=1 SV=1 Site of Methyllysine:575

MSSMWSEYTIIGGVKIYFPYKAYPSQLAMMNSILRGLNSKQHCLLESPTGSGKSLALLCSA  
LAWQQSLSGKPADEGVSEKAEVQLSCCCACHSKDFTNNDMNQGTSRHFNYPSTPPSERNG  
TSSTCQDSPEKTTAAKLSAKKQASIYRDENDDFQVEKKRIRPLETTQQIRKRHCFGTEV  
HNLDAKVDSGKTVKLNPLEKINSFSPQKPPGHCSRCCCSTKQGNSQESSNTIKKDHTGK  
SKIPKIYFGTRTHKQIAQITRELRRRTAYSGVPMILSSRDHTCVHPEVVGNFNRNEKCME  
LLDGKNGKSCYFYHGVHKISDQHTLQTFQGMCKAWDIEELVSLGKKLKACPYTARELIQ  
DADIIFCPYNYLLDAQIRESMDLNLKEQVVILDEAHNIEDCARESASYSVTEVQLRFARD  
ELDSMVNNNIRKKDHEPLRAVCCSLINWLEANAAYLVERDYESACKIWSGNEMLLTLHKM  
GITTATFPILQGHFSAVLQKEEKISPIYGKEEAREVPVISASTQIMLKGLFMVLDYLFQ  
NSRFADDYKIAIQQYTSWTNQIDISDKNGLLVLPKNKKRSRQKTAVHVLNFWCLNPAVAF  
SDINGKVQTIIVLTSGLSPMKFSSELGVTFTIQLEANHIKNSQVWVGTIGSGPKGRNL  
CATFQNTETFEFQDEVGALLSVCQTVSQGILCFLPSYKLEKLERWLSTGLWHNLELV  
KTVIVEPQGGKTNFDELLQVYDAIKYKGEKDGALLVAVCRGKVSEGLDFSDDNARAVI  
TIGIPFPNVKDLQVELKRQYNDHHSKLRGLLPGRQWYEQAYRALNQALGRCIRHRNDWG  
ALILVDDRFRNNPSRYISGLSKWVRQQIQHHSTFESALESIAEFSSKHKQVLNVS IKDRT  
NIQDNSTLEVTSLKYSTPPYLLAASHLSPENFVEDEAKICVQELQCPKIITKNSPLPS  
SIIISRKEKNDPVFLEEAGKAEKIVISRSTSPTFNKQTKRVSWSFNSLQYFTGKIPKAT  
PELGSSSENSASSPPRFKTEKMEKTVLPFTDKCESSNLTVNTSFGSCPQSETIISSLKID  
ATLTRKNHSEHPLCSEEALDPDIELSLVSEEDKQSTS NRDFETEAEDESIFTPELYDPE  
DTDEEKNDLAETDRGNRLANNSDCILAKDLFEIRTIKEVDSAREVKAEDCIDTKLNGILH  
IEESKIDDDIGNVKTWINELELGKTHEIEIKNFKPSKSKNGMFPGFK

>sp|Q86XP3|DDX42\_HUMAN ATP-dependent RNA helicase DDX42 OS=Homo sapiens  
GN=DDX42 PE=1 SV=1 Site of Methyllysine:708

MNWNKGGPGTKRFGFGGFAISAGKKEEPKLPQQSHSAFGATSSSSGFGKSAPPQLPSFY  
KIGSKRANFDEENAYFEDEEEDSSNVDPYIPAENSPTRQQFHSKPVDSDDDDPLEAFM  
AEVEDQAARDMKRLEEKDKERKNVKGIRDDIEEEDDQEAYFRYMAENPTAGVVQEEEDN  
LEYSDGNPIAPTKKIIDPLPIDHSEIDYPPFEKNFYNEHEEITNLTPQQQLIDLRHKLN  
LRVSGAAPP RPSSFAHFGFDEQLMHQIRKSEYTQPTPIQCQGVVVALSGRDMIGIAKTG  
SGKTAAFIWPMLIHIMDQKELEPGDGPIAVIVCPTRELCCQIHAECKRFGKAYNLRVAV  
YGGGSMWEQAKALQEGAEIVVCTPGRLIDHVKKKATNLQRVSYLVFDEADRMFDMGFYQ  
VRSIASHVRPDRQTLFSATFRKKIEKLARDILIDPIRVVQGDIGEANEDVTQIVEILHS  
GPSKWNWLTRRLVEFTSSGSVLLFVTKKANAEELANNLKQEGHNLGLLHGDMDQSERNKV  
ISDFKKKDIPVLVATDVAARGLDIPSIKTVINYDVARIDIDTHTRIGRTGRAGEKVAYT  
LLTPKDSNFAGDLVRNLEGANQHVSKELLDLAMQNAWFRKSRFKGGKGLNIGGGGLGY  
RERPLGSENMDRGNVMSNYEAYKPSGTAMGDRLTAMKAAFQSQYKSHFVAASLSNQK  
AGSSAAGASGWSAGSLNSVPTNSAQQGHNSPDPVTSAAKGIPIFGNTGNISGAPVTYP  
SAGAQGVNNTASGNSREGTGGNGKRERYTENRGSSRHSGETGNRHSDSPRHGDGGRH  
GDGYRHPPESSRHTDGHHRHGENRHGGSAGRHGENRGANDGRNGESRKEAFNRESKMEPKM  
EPKVDSSKMDKVDKTDKTADGFAVPEPPKRKRSRWS

>sp|Q9H9B1|EHMT1\_HUMAN Histone-lysine N-methyltransferase EHMT1 OS=Homo sapiens



SRDIRTGEELGFDYGDRFWDIKSKYFTQCQCGSEKCKHSAEIALEQSRLARLDPHPELLP  
ELGSLPPVNT

>sp|Q9H9T3|ELP3\_HUMAN Elongator complex protein 3 OS=Homo sapiens GN=ELP3 PE=1  
SV=2 Site of Methyllysine:229

MRQKRKGDLSPAELMMLTIGDVIKQLIEAHEQGKDIDLNKVKTAAKYGLSAQPRLVDI  
IAAVPPQYRKVLMPLKAKPIRTASGIAVAVMCKPHRCPHISFTGNICVYCPGGPDSDF  
EYSTQSYTGYEPTSMRAIRARYDPFLQTRHRIEQLKQLGHSVDKVEFIVMGGTFMALPEE  
YRDYFIRNLHDALSGHTSNNIYEAVKYSERSLTKCIGITITETRPDYCMKRHLSMMLTYGC  
TRLEIGVQSVYEDVARDTNRGHTVKAVCESFHAKDSGFKVVAHMMPDLPNVGLERDIEQ  
FTEFFENPAFRPDGLKLYPTLVIRGTGLYELWKSGRYKSYSPSDLVELVARILALVPPWT  
RVYRVQRDIPMLVSSGVEHGNLRELALARMKDLGIQCRDVRTREVGIQEIHHKVRPYQV  
ELVRRDYVANGGWETFLSYEDPDQDILIGLLRLKCSSETFRFELGGGVIVRELHVYGS  
VVPVSSRDPTKQHQGFGLLMEEAERIAREEHSGKIAVISGVGTRNYRKYGYRLQGP  
YMKMLK

>sp|Q92800|EZH1\_HUMAN Histone-lysine N-methyltransferase EZH1 OS=Homo sapiens  
GN=EZH1 PE=1 SV=2 Site of Methyllysine:736

MEIPNPPTSKCITYWKRKVKSEYMRLRQLKRLQANMGAKALYVANFAKVQEKTIILNEEW  
KKLRVQPVQSMKPVSGHPFLKKCTIESIFPGFASQHMLMRLNTVALVPIMYSWSPLQQN  
FMVEDETVLCNIPYMGDEVKEEDEFIEELINNYDGKVHGEEMIPGSVLISDAVFLELV  
DALNQYSDEEEEGHNDTSDGKQDDSKEDLPVTRKRKRHAIEGNKSSKKQFPNDMIFSAI  
ASMPFENGVPDDMKERYRELEMSDPNALPPQCTPNIDGPNKSVQREQLHSFHTLFCR  
RCFKYDCFLHPPHATPNVYKRKNKEIKIEPEPCGTDCFLLEGAKEYAMLHNPRSKCSGR  
RRRRHHIVSASCSNASASAVAETKEGSDRDTGNDWASSSSEANSRCQTPTKKASPAPP  
QLCVVEAPSEPVEWTGAEESLFRVFHGTFFNNFCSIARLLGKTCKQVFQFAVKESLILK  
LPTDELMNPSQKKRKHRLWAAHCRKIQLKKDSSSTQVYNYQPCDHPDRPCDSTCPCIMT  
QNFCEKFCQCNPDQNRFPGCRCKTQCNTKQCPCYLAVRECDPLCLTCGASEHWDCCKV  
SCKNCSIQRGLKHLHLLAPSDVAGWGTFIKESVQKNEFISEYCGELISQDEADRRGKVYD  
KYMSSFLFNLNDFVVDATRKGNKIRFANHSVNPNCYAKVVMVNGDHRIGIFAKRAIQAG  
EELFFDYRYSQADALKYVGIERETDVL

>sp|Q15910|EZH2\_HUMAN Histone-lysine N-methyltransferase EZH2 OS=Homo sapiens  
GN=EZH2 PE=1 SV=2 Site of Methyllysine:510

MGQTGKKSEKGPVCRKRVKSEYMRLRQLKRFRRRADEVKSMFSSNRQKILERTEILNQEW  
KQRRIQPVHILTSVSSLRGTRECSVTSDDLDFPTQVIPLKTLNAVASVPIMYSWSPLQQNF  
MVEDETVLHNPYMGDEVLQDGTIEELIKNYDGKVHGDRECGFINDEIFVELVNALGQ  
YNDDDDDDGDDPEEREKQKQDLEDHRDDKESRPPRKFPSDKIFEAISSMFPDKGTAEEL  
KEYKELTEQQLPGALPPECTPNIDGPNKSVQREQLHSFHTLFCRRCFKYDCFLHPPH  
ATPNTYKRKNTETALDNKPCGPQCYQHLEGAKEFAAALTAERIKTPPKRPGRRRGRLPN  
NSSRPSTPTINVLESKDTSDREAGTETGGENNDKEEEEKDETSSSSEANSRCQTPIKM  
KPNIEPPENVEWGSAGEASMFVRLIGTYDNFCAIARLIGTKTCRQVYEFVKESSIIAPA  
PAEDVDTPPRKKRKHRLWAAHCRKIQLKKDSSNHVYNYQPCDHPRQPCDSSCPCVIAQ  
NFCEKFCQCSSECNRFPGCRCKAQCNTKQCPCYLAVRECDPLCLTCGAADHWDSKNVS  
CKNCSIQRGSKHLHLLAPSDVAGWGFIFKDPVQKNEFISEYCGEIIISQDEADRRGKVYDK  
YMCSFLFNLNDFVVDATRKGNKIRFANHSVNPNCYAKVMMVNGDHRIGIFAKRAIQTGE  
ELFFDYRYSQADALKYVGIEREMEIP

>sp|094761|RECQ4\_HUMAN ATP-dependent DNA helicase Q4 OS=Homo sapiens GN=RECQ4  
PE=1 SV=1 Site of Methyllsine:114

MERLRDVRERLQAWERAFRRQRGRPSQDDVEAAPEETRALYREYRTLKRTTGQAGGGLR  
SSESLPAAAEAEPEPRCWGPHLNRAATKSPQPTPGRSRQGSVPDYGQRLKANLKGTLQAG  
PALGRRPWPLGRASSKASTPKPPGTGPVPSFAEKVSDEPPQLPEPQPRPGRLQHLQASLS  
QRLGSLDPGWLQRCHSEVPDFLGAPKACRPDLGSEESQLLIPGESAVLPGAGSQGPEAS  
AFQEVSIKRVGSPQSSSSGGEKRRWNEEPWESPAQVQQESSQAGPPSEGAGAVAVEEDPPG  
EPVQAQPPQPCSSPSNPRYHGLSPSSQARAGKAEGTAPLHIFPRLARHDRGNYVRLNMKQ  
KHVYRGRALRSRLLRKQAWKQKWRKKGECFGGGATVTTKESCFLNEQFDHAAQCPRPA  
SEEDTAVGPEPLVPSQPVEVPSLDPTVLPYLSLPGSGLAETPAEVFQALEQLGHQA  
FRPQQERAVMRILSGISTLLVLPTGAGKSLCYQLPALLYSRSPCLTLVVSPLLSLMDQ  
VSGLPCLKAACIHSMTKQRESVLKIRAAQVHVLMLTPEALVGAGGLPAAQLPPVA  
FACIDEAHCLSQWSHNFRCYLRVCKVLRERMVHCFGLTATATRRASDVAQHLAVAE  
EPDLHGPAVPTNLHLSVSMRDRDQALLTLLQGKRFQNLDSIIYCNRRREDTERIAALL  
RTCLHAAWVPGSGGRAPKTTAEAYHAGMCSRERRRVQRAFMQQLRVVAVTAVFGMLDR  
PDVRAVLHLGLPPSFESYVQAVGRAGRDGQPAHCHLFLQPQGEDLRELRRHVHADSTDFL  
AVKRLVQRVFPACTCTRPPSEQEGAVGGERPVPKYPPQEAQLSHQAAPGPRRVCMGH  
ERALPIQLTVQALDMPEEA IETLLCYLELHPHHWLELLATTYTHCRLNCPGGPAQLQALA  
HRCPLAVCLAQQLPEDPGQSSSVFDMVKLVDSMGWELASVRRALCQLQWDHEPRTGV  
RRGTGVLVEFSELAFLRSPGDLTAEKDQICDFLYGRVQARERQALARLRRTFQAFHSV  
AFPCGPLEQQDEERSTRKDLLGRYFEEEEQEPGGMEDAQGPEPGQARLQDWEDQVR  
CDIRQFLSLRPEEKFSRAVARIFHGIGSPCYPAQVYGQDRRFWRKYLHLSFHALVGLAT  
EELLQVAR

>sp|Q15047|SETB1\_HUMAN Histone-lysine N-methyltransferase SETDB1 OS=Homo  
sapiens GN=SETDB1 PE=1 SV=1 Site of Methyllsine:1170, 1178

MSSLPGCIGLDAATAVESEEIAELQQAVVEELGISMEELRHFIDEELEKMDCVQQRKQ  
LAELETWVIQKESEVAHVDQLFDDASRAVTNCESLVKDFYSKLGQLYRDSSEDESSRPT  
EIEIPDEDDVLSIDSGDAGSRTPKDQKLREAMAALRKSADVQKFMDAVNKKSSSQDL  
HKGTLSQMSGELSKDGLIVSMRILGKRTKTWHKGTLIATQTVGPGKKYKVKFDNKGKS  
LLSGNHIAYDYHPPADKLYGSRVVAKYKGNQVWLYAGIVAETPNVKNKLRFLIFFDDG  
YASYVTQSELYPICRPLKKTWEDIEDISCRDFIEEYVTAYPNRPMVLLKSGQLIKTEWEG  
TWWKSRVEEVDGSLVRILFLDDKRCEWIYRGSTRLEPMFSMKTSSASALEKKQQLRTRP  
NMGAVRSKGPVVYQTQDLTGTGTQFKPVEPPQPTAPPAPPFPAPPLSPQAGSDLESQ  
AQSRKQVAKKSTFRPGSVGSHSSPTSPALSENVGGKPGINQTYRSLPGSTASAPAPS  
ALPAPPAPPVFGMLERAPAEPSYRAPMEKLFYLPHVCSYTCLSRVRPMRNEQYRGKNPL  
LVPLLYDFRRMTARRRVNRKMGFHV IYKTPCGLCLRTMQEIERYL FETGCDFLFLEMFL  
DPYVLVDRKQFYKPFYYILDIYTKEDVPLSCVNEIDTTPPPQVAYSKERIPGKGVFIN  
TGPEFLVGCDCCKDGRDQKSKCACHQTLIQATACTPGGQINPNSGYQYKRLEECLPTGVYE  
CNKRCKCDPNMCTNRLVQHGLQVRLQLFKTQNKGWGIRCLDDIAKGSFVCIYAGKILTDD  
FADKEGLEMGDEYFANLDHIESVENFKEGYESDAPCSSDSSGVLDKQEDGNSGTEDPEE  
SNDDSSDNFCKDEDFSTSSVWRSYATTRQTRGQKENGLETTSKDSHPPDLGPPHIPVP  
PSIPVGGCNPSSSEETPKNKVASWLSCNSVSEGGFADSDSHSSFKTNEGGEGRAGGSRME  
AEKASTSGLGIKDEGDIKQAKKEDTDDRNMKSVVTESSRYGYNPSPVKPEGLRRPPSKT  
SMHQSRRLMASAQNPDDVLTLSSTESEGESGTSRKPTAGQTSATAVDSDDIQTISSGS

EGDDFEDKKNMTGPMKRQVAVKSTRGFALKSTHGIAIKSTNMASVDKGESAPVRKNTRQF  
YDGEESCYIIDAKLEGNLGRYLNHSCSPNLFVQNVFVDTHDLRFPWVAFFASKRIRAGTE  
LTWDYNYEVGSVEGKELLCCCGAIECRGRLL

>sp|Q93075|TATD2\_HUMAN Putative deoxyribonuclease TATDN2 OS=Homo sapiens  
GN=TATDN2 PE=2 SV=2 Site of Methyllysine:56

MASERGVKHNWSSSTSEGCPKRKRSCLREPCDVAPSSRPAQRSASRSGGPSSPKRLKAQKE  
DDVACSRRLSWGSSRRRNNSSSFSPHFLGPGVGAASKGCLIRNTRGFLSSGGSPLRPA  
NASLEEMASLEEEACSLKVDKSSHNSTNSEFAAEAEQNDTIEEPNKVQKRKRDRLRD  
QGSTMIIYLKAIQIGLGSMPKRKGEAATRAKPSAAEHPSHGEGPARSEGPAKTAEGAARS  
VTVTAAQKEKDATPEVSMEEKTVPERSFFYDRRVVIDPQEKPSPEPLGDRRTVIDKCSF  
PLEFLDDSDSHLEIQKHKDREVMHPSSGSDWSDVEEISTVRFSEQEPPVSLKPSAVPEP  
SSFTTDYVMYPPHLYSSPWCDYASYWTSSPKPSSYPSTGSSSNDAAQVGKSSRSRMSDYS  
PNSTGSVQNTSRDMEASEEGWSQNSRSFRFRSSEEREVEKEKRTFQEEMPPRCPGGHASS  
SLPKSHLEPSLEEGLDTHCHLDMLYSKLSFGTFTKFRKIYSSSFPKEFQGCISDFCDP  
RTLTDCLWEELLKEDLVWGAFGCHPHFARYYSESQERNLLQALRHPKAVAFGEMGLDYSY  
KCTTPVPEQHKVFERQLQLAVSLKKPLVIHCREADEDLLEIMKKFVPPDYKIHRHCFTGS  
YPVIEPLLKYFPNMSVGFTAVLTYSSAWEAREALRQIPLERIIVETDAPYFLPRQVPKSL  
CQYAHPLGLALHTVREIARVKDQPLSLTLAALRENTSRLYSL

>sp|P60174|TPIS\_HUMAN Triosephosphate isomerase OS=Homo sapiens GN=TPI1 PE=1  
SV=3 Site of Methyllysine:231

MAEDGEEAEFHFAALYISGQWPRLRADTDLQRLGSSAMAPSRKFFVGGNWKMNKRKQSLG  
ELIGTLNAAKVPADTEVVCAPPTAYIDFARQKLDPKIAVAAQNCYKVTNGAFTGEISPGM  
IKDCGATWVVLGHSERRHVFGESEDELIGQVAHALAEGLGVIACIGEKLDEREAGITEKV  
VFEQTKVIADNVKDWKSVLVEPVWAIIGTGKTATPQQAQEVHEKLRGWLKSNVSDAVAQ  
STRIIYGGSVTGATCKELASQPDVDGFLVGGASLKPEFVDIINAKQ

>sp|Q9Y2L1|RRP44\_HUMAN Exosome complex exonuclease RRP44 OS=Homo sapiens  
GN=DIS3 PE=1 SV=2 Site of Methyllysine:331

MLKSKTFLKKTRAGGVMKIVREHYLRDDIGCGAPGCAACGGAHEGPALEPQPDPASSVC  
PQPHYLLPDTNVLHQIDVLEDPAIRNVIQLTVLQEVNRNSAPVYKRIRDVNTNNQEKHF  
YTFTNEHHRETYVEQEQQENANDRNDRAIRVAAKWYNEHLKMSADNLQVIFITNDRRN  
KEKAIEEGIPAFTCEEYVKSLTANPELIDRLACLSEEGNEIESGKIFSEHLPLSKLQQG  
IKSGTYLQGTFRASRENYLEATVWIHGDNEENKEIILQGLKHLNRAVHEDIVAVELLPKS  
QWVAPSSVVLHDEGQNEEDVEKEEETERMLKTAVSEKMLKPTGRVVGIIKRNWRPYCGML  
SKSDIKESRRHLFTPADKRIPIRIETRQASTLEGRIIVAIIDGWPRNSRYPNGHFVRNL  
GDVGEKETETEVLLLEHDVPHQPFSQAVLSFLPKMPWSITEKDMKNREDLRHLCICSVDP  
PGCTDIDDALHCRELENGNLEVGVHIADVSHFIRPGNALDQESARRGTTVYLCEKRIDMV  
PELLSSNLCSLKCVDRLAFSCIWEMNHNAEILKTKFTKSVINSKASLTAEALRIDS  
NMNDDITSLRGLNKLAKILKKRRIEKGALTLSSPEVRFHMDSETHDPIDLQTKELRET  
SMVEEFMLLANISVAKKIHHEFSEHALLRKHPAPPSNYEILVKAARSRLNLEIKTDTAKS  
LAESLDQAESPTFPYLNLLRILATRCMMQAVYFCSGMNDNFHHYGLASPIYTHFTSPIR  
RYADVIVHRLLAIVAGACTYPELTDKHLADICKNLNFRHKMAQYAQRASVAFHTQLFF  
KSKGIVSEEAYILFVRKNAIVVLPKYGLEGTVFFEEKDKPNPQLIYDDEIPSLKIEDTV  
FHVFDKVKVKIMLDSSNLQHQKIRMSLVEPQIPGISIPTDTSNMDLNGPKKKMKLKG

>sp|Q96N67|DOCK7\_HUMAN Dedicator of cytokinesis protein 7 OS=Homo sapiens



GN=DOCK7 PE=1 SV=4 Site of Methyllysine:381

MAERRAFAQKISRVAEEVRKQISGQYSGSPQLLKNLNI VGNISHHTTVPLTEAVDPVDL  
EDYLITHPLAVDSGLRDLIEFPPDDIEVVYSPRDCRTLVS AVPEESEMDPHVRDCIRSY  
TEDWAI VIRKYHKLGTGFNPNTL DKQKERQKGLPKQVFESDEAPDGNSYQDDQDLKRRS  
MSIDDTPRGSWACSF DLKNSLPDALLPNLLDRTPNEEIDRQNDQ RKS NRHKELFALHP  
SPDEEPIERLSVPDIPKEHFGQRLLVKCLSLKFEIEIEPIFASLALYDVKEKKKISENF  
YFDLNSEQMKGLLRPHVPPAAITTLARSAIFSITYPSQDVFLVIKLEKVLQQDIGECAE  
PYMIFKEADATKNKEKLEKLSQADQFCQRLGKYRMPFAWTAIHLMNIVSSAGSLERDST  
EVEISTGERKGSWSERRNSSIVGRRSLERTTSGDDACNLTSFRPATLTVTNFFKQEGDRL  
SDEDLYKFLADMRRPSSVLRRLRPIT AQLKIDISPAPENPHYCLTPELLQVKLYPDSRVR  
PTREILEFPARDVYVNPNTTYRNLLYIYPQSLNFANRQGSARNITVKVQFMYGEDPSNAMP  
VIFGKSSCSEFSKEAYTAVVYHNRSPDFHEEIKVKLPATLTDHHL LFTFYHVSCQQKQN  
TPLETPVGYTWIPMLQNGRLKTGQFC L PVSLEKPPQAYSVLSPEVPLPGMKWVDNHKGVF  
NVEVVAVSSIHTQDPYLDKFFALVNALDEHLFPVRIGDMRIMENNL ENELKSSISALNSS  
QLEPVVRFHL LLDKILLVIRPPVIAGQIVNLGQASFEAMASIINRLHKNLEGNHQHG  
RNSLLASYIHVFRLPNTY PNSSSPGGGLGGSVHYATMARS AVRPASLNLNRSRSLSNS  
NPDISGTPTSPDDEVERSIIGSKGLDRSNSWVNTGGPKAAPWGSNPSPSAESTQAMDRSCN  
RMSHTTETSSFLQTLTGRLPTKKLFHEELALQWVVCSGSVRESALQQAWFFFELMVKSMV  
HHLFYNDKLEAPKRSRPFERFMDIAALVSTIASDIVSRFQK DTEMVERLNTSLAFFLND  
LLSVMDRGFVFSLIKSCYKQVSSKLYSLPNPSVLVSLRDLFLRIIC SHEHYVTLNLP CSL  
LTPPASPSVSSATSQSSGFSTNVQDQKI ANMFELSV PFRQQHYLAGLV LTELAVILD P  
DAEGLFGLHKKVINMVHNLSSHSDPRYSDPQIKARVAMLYLPLIGIIMETVPQLYDFT  
ETHNQGRGPIC IATDDYESESGSMISQTVAMA IAGTSVPQLTRPGSFLLTSTSGRQH TTF  
SAESSRLLICLLWV LKNADETVLQKWF TDL SVLQLNRLLDLLYLCVSCFEYKGGKVFER  
MNSLTFKKS KDMRAKLEEA I LGSIGARQEMVRRSRGQLGTYT IASPPERSPSGSAFGSQE  
NLRWRKDMTHWRQNT EKLDKSRAEIEHEALIDGNLATEANLI ILDTLEIVVQTVSVTESK  
ESILGGVLKVL LHSMACNQSAVYLQHC FATQRALVSKFPELLFEEETE QCADLCLRLLRH  
CSSSIGTIRSHASASLYLLMRQNF EIGNNFARVKMQVTMSLSSLVGTSQNFNEEFLRRSL  
KTILTYA EEDLELRETTFPDQVQDLVFNLHMILSDTVKMEHQEDPEMLIDL MYRIAKGY  
QTSPDLRLTWLQNMAGKHSERSNHAEAAQCLVHSAALVAEYLSMLEDRKYL PVGCVT FQN  
ISSNVLEESA VSDDVSPDEEGICSGKYFTESGLVGLLEQAAASF SMAGMYEAVNEVYKV  
LPIIHEANRDAKKLSTIHGKLQEA FSKIVHQSTGWERMFGTYFRVGFYGT KFGDLDEQEF  
VYKEPAITKLA EISHRLEGFYGERFGEDVVEVIKDSNPVDKCKLDPNKAYIQITYVEPYF  
DTYEMKDRITYFDKNYNLRRFMYCTPFTLDGRAHGELHEQFKRKTILTTSHAFPIKTRV  
NVTHKEEII LTPIEVAIEDMQKKTQELAFATHQDPADPKMLQMV LQGSVGT TVNQGPLEV  
AQVFLSEIPSDPKLFRH HNKLR LCFKDFTKRCE DALRKNKSLIGPDQKEYQRELERNYHR  
LKEALQPLINRKIPQLYKAVLPVTCHRDSFSRMSLRKMDL

>sp|Q7Z699|SPRE1\_HUMAN Sprouty-related, EVH1 domain-containing protein 1

OS=Homo sapiens GN=SPRED1 PE=1 SV=2 Site of Methyllysine:224  
MSEETATSDNDNSYARVRVAVMTRDDSSGGWLP LGGSLSSVT VFKVPHQEENG CADFFI  
RGERLRDKMVVLECLMKDLIYNKVTPTFH HWKIDDKKFG LTFQSPADARAFDRGIRRAI  
EDISQGCPE SKNEAEGADDLQANEEDSSSSLVKDHLFQQETVVTSEPYRSSNIRPSPFED  
LNARRVYMQSQANQITFGQPGLDIQSRSM EYVQRQISKECGSLKSQNRVPLKSIRHVSFQ  
DEDEIVRINPRDILIRRYADYRHPDMWKNDLERDDADSSIQFSKPD SKKSDYLYSCGDET

KLSSPKDSVVFVKTPSSLKIKKSKRRKEDGERSRCVYCQERFNHEENVRGKCQDAPDPIK  
RCIYQVSCMLCAESMLYHCMSDSEGFSDPCSCDTSDDKFCLRWLALVALSFIVPCMCCY  
VPLRMCHRCGEACGCCGGKHAAG

>sp|A1X283|SPD2B\_HUMAN SH3 and PX domain-containing protein 2B OS=Homo sapiens  
GN=SH3PX2B PE=1 SV=3 Site of Methyllsine:619

MPPRRSIVEVKVLDVQKRRVFNKHYVYIIRVTWSSGSTEAIYRRYSKFFDLQMQMLDKFP  
MEGGQKDPKQRIIPFLPGKILFRRSHIRDVAVKRLIPIDEYCKALIQLPPIYSQCDEVLQ  
FFETRPEDLNPPKEEHIGKKKSGGDQTSVDPVLEQYVVVANYQKQESSEISLSVGQVVD  
IIEKNESGWWFVSTAEQGWVPATCLEGGQDGVQDEFSLQPEEEEEKYTVIYPYTARDQDEM  
NLERGAVVEVIQKNELEGGWIKIRYQKKEGWAPASYLKKNSGEPLPPKPGSPSPHPGALDL  
DGVSRQQNAVGREKELLSSQRDRFEGRPVDPGDAKQSRPKMRQRPVPRRDMTIPRGLNL  
PKPPIPPQVEEYYTIAEFQTTIPDGISFQAGLKVEVIEKNLSGWWYIQIEDKEGWAPAT  
FIDKYKTSNASRPNFLAPLPHVETQLRLGEEAALENNTGSEATGPSRPLPDAPHGVMDS  
GLPWSKDWKSGKVDLRKASSDMSASAGYEEISDPDMEEKPSLPPRKESIKSEGELLERE  
RERQRTEQLRGPTKPPGVILPMPAKHIPPARDSRRPEPKPKSRLFQLKNDMGLECGH  
KVLAKEVKKPNLRPISKSKTDLPEEKPDATPQNPFLKSRPQVRPKPAPSPKTEPPQGEDQ  
VDICNLRSKLRPAKSQDKSLLDGEGPQAVGGQDVAFSRSFLPGEGPGRADRTGKQDGLS  
PKEISCRAPRPAKTTPVSKSVVPLQEAQQRPVPPRRPPPKTSSSRPLPEVRG  
PQCEGHESRAAPTGRALLVPPKAKPFLSNLSLGGQDDTRGKGSGLPWGTGKIGENREKAA  
AASVPNADGLKDSLYAVAVDFEGDKDTSSFQEGTVFEVREKNSSGWWFCQVLSGAPSWEG  
WIPSNYLRKKP

>sp|Q9NPJ3|ACO13\_HUMAN Acyl-coenzyme A thioesterase 13 OS=Homo sapiens  
GN=ACOT13 PE=1 SV=1 Site of Methyllsine:111

MTSMTQSLREVIKAMTKARNFERVLGKITLVSAAAPGKVICEMKVEEHTNAIGTLHGGLT  
ATLVDNISTMALLCTERGAPGVSVMNITYMSPAKLGEDIVITAHVLKQGKTLAFTSVDL  
TNKATGKLIAGRHKHLGN

>sp|P04075|ALDOA\_HUMAN Fructose-bisphosphate aldolase A OS=Homo sapiens  
GN=ALDOA PE=1 SV=2 Site of Methyllsine:330

MPYQPALTPEQKKELSDIAHRIVAPGKGIILAADESTGSIKRLQSIGTENTEENRRFYR  
QLLLTADDRVNPCIGGVILFHETLYQKADDGRFPFQVIKSKGGVVGKVDKGVVPLAGTN  
GETTTQGLDGLSERCAQYKKGADFAKWRCVLKIGEHTPSALAIMENANVLARYASICQQ  
NGIVPIVEPEILPDGDHDLKRCQYVTEKVLAAVYKALSDHHIYLEGTLKPNMVTTPGHAC  
TQKFSHEEIAMATVTALRRTVPPAVTGITFLSGGQSEEEASINLAINKCPLLKPWALTF  
SYGRALQASALKAWGGKKNLAAAQEEYVKRALANSLACQGYTPSGQAGAAASESLFVS  
NHAY

>sp|P38117|ETFB\_HUMAN Electron transfer flavoprotein subunit beta OS=Homo  
sapiens GN=ETFB PE=1 SV=3 Site of Methyllsine:202

MAELRVLVAVKRVIDYAVKIRVKPDRGTGVVTDGVKHSMPFCEIAVEEAVRLKEKKLVKE  
VIAVSCGPAQCQETIRTALAMGADRGIVVEVPPAEAERLGPLQVARVLAKLAEKEKVDLV  
LLGKQAIIDDCNQGTQMTAGFLDWPQGTAFASQVTLGDKLKVEREIDGGLETLRLKLPV  
VTADLRLNEPRYATLPNIMKAKKKKIEVIKPGDLGVDLTSKLSVISVEDPPQRTAGVKVE  
TTEDLVAKLKEIGRI

>sp|Q9Y512|SAM50\_HUMAN Sorting and assembly machinery component 50 homolog  
OS=Homo sapiens GN=SAMM50 PE=1 SV=3 Site of Methyllsine:255

MGTVHARSLEPLPSSGPDFGGLGEEAEFVEVEPEAKQEILENKDVVVQHVFHDGLGRTKD  
DIIICEIGDVFKAKNLIIEVMRKSHEAREKLLRLGIFRQVDVLIDTCQGDDALPNGLDVTF  
EVELRRLTGSYNTMVGNNESMVLGKLPNLLGRAEKVTFQFSYGTKETSIGLSFFKPR  
PGNFERNFSVNLKYVTGQFPWSSSLRETDRGMSAEYSFPIWKTSHTVKWEVWRELGCLSR  
TASFAVRKESGHSLKSSLSHAMVIDSRNSSILPRRGALLKVNQELAGYTGDDVFSFIKEDF  
ELQLNKQLIFDSVFSASFVGGMLVPIGDKPSSIADRFYLGGPISRGFMSHSIGPQSEGD  
YLGGEAYWAGGLHLYTLPFRPGQGGFELFRTHFFLNAGLNCNLNYGEGPKAHIRKLAE  
CIRWSYGAGIVLRLGNIARLELNYCVPMGVQTGDRICDGVQFGAGIRFL

>sp|043929|ORC4\_HUMAN Origin recognition complex subunit 4 OS=Homo sapiens  
GN=ORC4 PE=1 SV=2 Site of Methyllysine:7

MSSRKSNSLIHTECLSQVQIRLRERFCRQSPHSNLFVGVQVQYKHLSELLKRTALHGES  
NSVLIIGPRGSGKTMLINHALKELMEIEEVENLQVHLNGLLQINDKIALKEITRQLNL  
ENVVGDVKGFSFAENLSFLEALKKGDRTSSCPVIFILDEFDLFAHKNQTLNLYNLFDIS  
QSAQTPIAVIGLTCRLDILELLEKRVKSRFHRQIHLNMSFGFPQYVKIFKEQLSLPAEF  
PDKVFAEKWNENVQYLSEDRSVQEVQKHFNISKNLRLHMLLMLALNRVTASHPFMTAV  
DLMEASQLCSMDSKANIVHGLSVLEICLIAMKHLNDIYEEEPFNFMVYNEFQKQVQRK  
AHSVYNFEKPVVMKAFEHLQLELIKPMERTSGNSQREYQLMKLLLDNTQIMNALQKYPN  
CPTDVRQWATSSLSWL

>sp|095248|MTMR5\_HUMAN Myotubularin-related protein 5 OS=Homo sapiens GN=SBF1  
PE=1 SV=3 Site of Methyllysine:1222

MARLADYFVLVAFGPHRPGSGEGGQILQRFPEKDWDENPFPGIELFCQPSGWQLC  
PERNPPTFFVAVLTDINSERHYCACTFWEPAEPSQETTRVEDATEREEEGDEGGQTHLSPTA  
PAPSAQLFAPKTLVLVSRLDHTVEFRNSLGLIYAIHVEGLNVCLENVIGNLLTCTVPLAG  
GSQRTISLGAGDRQVIQTPLADSLPVSRCVALLFRQLGITNVLSLFCALTEHKVFLS  
RSYQRLADACRGLLALLFPLRYSFTYVPIIPAQLLEVLSTPTPIIGVNAAFQAETQELL  
DVIVADLDGGTVTIPECVHIPPLPEPLQSQTHSVLSMVLDPLELADLAFPPPTTSTSSL  
KMQDKELRAVFLRLFAQLLQGYRWCLHVRIHPEPVIHFHKAFLGQRGLVEDDFLMKVL  
EGMAFAGFVSRGVYRPTDLFDELVAHEVARMRADENHPQRVLRHVQELAEQLYKNENP  
YPAVAMHKVQRPGESSHRRVPRPRLDEGTVQWIVDQAAAKMQGAPPAVKAERTTVP  
SGPPMTAILERCSGLHVNSARRLEVVRNCISYVFEGKMLEAKKLLPAVLRALKGRAARRC  
LAQELHLHVQNRVAVLDHQQDFVVRMMNCCLQDCTSLDEHGIAAALLPLVTAFCRKLSP  
GVTQFAYSVCVQEHVWSTPQFWEAMFYGDVQTHIRALYLEPTEDLAPAQEVGEAPSQEDE  
RSALDVASEQRRLWPTLSREKQQLVQKEESTVFSQAIHYANRMSYLLPLDSSKSRLLR  
ERAGLDLESASNSLVNMSMAGSVAESYDTESGFEDAETCDVAGAVVRFINRFVDKCTE  
SGVTS DHLKGLHVMVPDIVQMHITLEAVQRESRRLPIQKPKLLRPRLLPGEECVLDGL  
RVYLLPDGREGAGGSAGGPALLPAEGAVFLTTRYVIFTGMPDPLVGEQVVVRSFPVAA  
LTKEKRISVQTPVDQLLQDGLQLRSCFQLLKMAFDEEVGSDSAELFRKQLHKLRYPPDI  
RATFAFTLGSAAHTPGRPRVTKDKGPSLRTLRSNLVKNAKKTIGRQHVTRKKYNPPSWEH  
RGQPPPEDQEDEISVSEELPSTLTPSSALKPSDRMTMSSLVERACCRDYQRLGLGLTSS  
SLSRAKSEPFRI SPVNRMYAICRSYPGLLIVPQSVQDNALQRVSRCYRQNRFPVVCWRSG  
RSKAVLLRSGGLHGKGVVGLFKAQNAPSPGQSQADSSSLEQEKYLQAVVSSMPRYADASG  
RNTLSGFSSAHMGSHGKWSVRTSGRSSGLGTDVGSRLAGRDALAPPQANGPPDPGFLR  
PQRAALYILGDKAQLKGVRSPLQWELVPIEVFEARQVKASFKLLKACVPGCPAAEPS  
PASFLRSLDSEWLIQIHKLLQVSVLVVELLDSSGSSVLVGLDGDWITTVVSLVQLLSD

PFYRTLEGFRLLEKEWLSFGHRFHRGAHTLAGQSSGFTPVFLQFLDCVHQVHLQFPME  
FEFSQFYLKFLGYHHVSRFRFTFLDSDYERIELGLLYEEKGERRGQVPCRSVWEYVDRL  
SKRTPVFHNYMYAPEDAELRPYSNVSNLKVWDFYTEETLAEGPPYDWELAQGPPEPPEE  
ERSDGGAPQSRRRVWPCYDSCPRAQPDASRLLEELQRLETELGQPAERWKDTWDRVKA  
AQRLEGRPDGRGTPSSLLVSTAPHHRRSLGVYLQEGPVGSTLSLSLSDSQSSGSTSGSR  
QAARRSTSTLYSQFQTAESENRSYEGTLYKKGAFMKPWKARWFVLDKTKHQLRYDHRVD  
TECKGVIDLAEVEAVAPGTPTMGAPKTVDEKAFFDVKTTRRVYNFCAQDVPSAQQWVDRI  
QSCLSDA

>tr|C9JFZ1|C9JFZ1\_HUMAN Synaptojanin-1 OS=Homo sapiens GN=SYNJ1 PE=1 SV=1 Site  
of Methyllysine:565

MRKRWACWSGSDAPGGCGGRRRRRKRRAASEERRMAFSKGFRIYHKLDPPPPSLI  
VETRHKEECLMFESGAVAVLSSAEKEAIKGTYSKVLDAYGLLGVLRNLGDTMLHYLVLV  
TGCMSVGKIQESEVFRVTSTEFISLRIDSSDEDRISEVRKVLNSGNFYFAWSASGISLDL  
SLNAHRSMQEQTDRNFQSLHLHLKHYGVNCDWLLRLMCGGVEIRTIYAAHKQAKA  
CLISRLSCERAGTRFNVRGTNDGHHVANFVETEQQVYVLDSDVSSFIQIRGSVPLFWEQPG  
LQVGSHRVRMSRQFEANAPAFDRHFRRTLKNLYGKQIIVNLLGSKEGEHMLSKAFQSHLKA  
SEHAADIQMVNFYHQMVKGGKAEKLSVLPQVQKFLDYGFFYFNGSEVQRCQSGTVRT  
NCLDCLDRNTSVQAFGLGLEMLAKQLEALGLAEKPLVTRFQEVFRSMWSVNGDSISKIYA  
GTGALEGKAKLDGARSVTRTIQNNFFDSSKQEAIDVLLGNTLNSDLADKARALLTGS  
LRVSEQTLQSASSKVLKSMCFYKYSKPKKIRVCVGTWNVNGGKQFRSIAFKNQTLTDW  
LLDAPKLAGIQEFQDKRSKPTDIFAIGFEEMVELNAGNIVSASTNQKLWAVELQKTIISR  
DNKYVLLASEQLVGVCLFVIRPQHAPFIRDVAVDTVKTGMGGATGNKGAVAIRMLFHTT  
SLCFVCSHFAGQSQVKERNEDFIEIARKLSFPMGRMLFSHDYVFWCGDFNYRIDLPNEE  
VKELIRQQNWDSL IAGDQLINQKNAGQVFRGFLEGKVTFAPTYKYDLFSDDYDTSEKCR  
PAWTDRLWRRRKWPFDRSAEDDLLNASFQDESKILYTWTPGTLHYGRAELKTS DHRP  
VVALIDIDIFEVEAEERQNIYKEVIAVQGGPDGTVLVSISKSSLPENFFDDALIDELLQQ  
FASFGEVILIRFVEDKMWVTFLEGSSALNVLSLNGKELNRTITIALKSPDWIKNLEEEM  
SLEKISIALPSSSTLLGEDAEVAADFMEGDVDDYSAEVEELLPQHLQPSSSSGLGTS  
PSSSPRTSPCQSPITISEGPVSLPIRPSRAPSRTPGPPSAQSSPIDAQPATPLPQKDAQ  
PLEPKRPPPPRPVAPPTRPAPPQPPPPSGARSPAPTRKEFGGIGAPPSPGVARREMEAP  
KSPGTRKDNIGRSQSPQAGLAGPGPAGYSTARPTIPPRAGVISAPQSHARASAGRLTP  
ESQSKTSETSKGSTFLPEPLKQAAFPQSSLPQAQLQEPLVPVAAPMPQSGPQPNLE  
TPPQPPRSRSSHSLPSEASSQPQQEQPSG

>sp|P30101|PDIA3\_HUMAN Protein disulfide-isomerase A3 OS=Homo sapiens GN=PDIA3  
PE=1 SV=4 Site of Methyllysine:61

MRLRRLALFPGVALLAAARLAAASDVLELTDNFESRISDTGSAGLMLVEFFAPWCGHC  
KRLAPEYEAATRLLKGIPLAKVDCTANTNTCNKYGVSGYPTLKIIFRDGEEAGAYDGPRT  
ADGIVSHLKKQAGPASVPLRTEEEFKKFI SDKDASIVGFFDSSFSEAHSEFLKAASNLRD  
NYRFAHTNVEESLNEYDDNNEGII LFRPSHLTNKFEDKTVAYTEQKMTSGKIKKFIQENI  
FGICPHMTEDNKDLIQGKDLIIAYYDVYKNAKGSNYWRNRVMMVAKKFLDAGHKLNFA  
VASRKTFSHELSDFGLESTAGEIPVVAIRTAKGEKFMQEEFSRDGKALERFLQDYFDGN  
LKRYLKSEPIPESNDGPVKVVVAENFDEIVNNENKDVLEFYAPWCGHCKNLEPKYKELG  
EKLSKDPNIVIAKMDATANDVPSPYEVRGFPTIYFSPANKKLNPKKYEGGRELSDFISYL  
QREATNPPVIQEEKPKKKKKAQEDL

**Table S1.** Comparison of the predictive result in different methylarginine predictors with a testing dataset.

| Accession | Experimental methylarginine sites | Predicted sites in different methylarginine predictors |                        |            |                            |                |
|-----------|-----------------------------------|--------------------------------------------------------|------------------------|------------|----------------------------|----------------|
|           |                                   | MeMo                                                   | MASA                   | BPB-PPMS   | PMeS                       | iMethyl-PseAAC |
| O43823    | 188,190,194,233,277               | 188,190,194,233                                        | 188,190,233            | 188        | 188,194,277                | 188,190,233    |
| Q9ULX6    | 171,179,185,208,217,247           | 171,179,185,208,,247                                   | 171,179,208            | 208        | 217,247                    | -              |
| O75815    | 442                               | 442                                                    | -                      | -          | -                          | 442            |
| Q6XZF7    | 480,488                           | 480                                                    | -                      | -          | 488                        | -              |
| Q9Y4H2    | 412,429                           | 412                                                    | 412                    | -          | 412                        | 412            |
| Q15654    | 25,111,179,205,217,236,238        | 25,111,179,205,236,238                                 | 25,111,179,205,236,238 | 25,236,238 | 25,111,179,205,217,236,238 | 25,236,238     |
| Q8TF74    | 37,356,430                        | 37,356,430                                             | 37,430                 | -          | 256,430                    | -              |
| Q99959    | 46,125                            | 46,125                                                 | 46,125                 | -          | 46                         | 46             |
| Q9UKV3    | 8,14,29                           | 8,14,29                                                | 14,29                  | 29         | 8,14                       | 14             |
| Q9BZZ5    | 500,504,507,510                   | 500,504,507,510                                        | 500,504,507,510        | 507,510    | 500,504,507,510            | 504,507,510    |
| Q9NQS1    | 28,37,50                          | 37,50                                                  | 37                     | 37         | 37                         | 50             |
| O95817    | 121,261                           | 121,261                                                | -                      | -          | 121                        | -              |
| O95429    | 40,51,53,108,185,201              | 51,53,201                                              | 53,201                 | 53         | 40,51,53                   | 51             |
| Q8N163    | 16,180,184                        | 184                                                    | 184                    | -          | 180                        | -              |
| Q8TAP9    | 57,59,68,126                      | 59                                                     | -                      | -          | 126                        | -              |
| Q92530    | 205,231                           | 205                                                    | 205                    | 205        | 205,231                    | 205            |
| Q6Y7W6    | 107,118,120,149                   | 107,118,120,149                                        | 107,118,149            | 118,       | 107,118,120,149            | 120            |
| Q92686    | 38,68                             | 38,68                                                  | 38,68                  | 68         | 38,68                      | 68             |
| P04792    | 5,12,56                           | -                                                      | 12                     | -          | 12,56                      | -              |
| Q6PJG2    | 227,447                           | 447                                                    | 447                    | -          | -                          | -              |
| P62633    | 27,30,79                          | 27,30,79                                               | 27                     | 27         | 27,30                      | 27,30          |
| Q6ZRQ5    | 366,374                           | -                                                      | -                      | -          | -                          | -              |
| Q9BRQ0    | 105,131                           | -                                                      | -                      | -          | 105                        | 105            |
| P18583    | 936,943,950,997,1015,1090,1112    | 936                                                    | -                      | -          | -                          | -              |
| Q14966    | 33,41,47,49,54                    | 47,49                                                  | 49                     | -          | 33,41,47,49,54             | 33,41          |
| O43896    | 948,958,963,1041                  | 958,1041                                               | 958,1041               | 958,1041   | 958                        | 958,963,1041   |
| P08727    | 7,24,32,43,51                     | 43                                                     | 43                     | 43         | 24,32                      | 24,43          |
| P05787    | 18,23,32,40,47                    | 47                                                     | 32,47                  | 47         | 47                         | 23,47          |
| Q7Z736    | 638,642                           | 638,642                                                | 638                    | 638        | 638                        | 638            |
| O60293    | 95,99                             | 95,99                                                  | 95,99                  | -          | 95,99                      | -              |
| P13646    | 27,35                             | 27                                                     | 27                     | -          | -                          | 27             |
| P08729    | 25,46,48                          | -                                                      | -                      | -          | 25,46                      | 46,48          |
| O00571    | 88,93,95,617,632                  | 88,93,95,632                                           | 88,93,632              | 632        | 93,617,632                 | 88,632         |

|        |             |            |            |        |          |          |
|--------|-------------|------------|------------|--------|----------|----------|
| Q86XP3 | 12,814,875  | 12,814,875 | 12,814,875 | 12,875 | 12,875   | 12       |
| Q8IVS2 | 79,86,340   | 79         | 340        | -      | 79,86    | -        |
| Q8WUA2 | 435,437,443 | 443        | -          | -      | -        | -        |
| P49247 | 21,42,46,52 | 21,52      | 52         | 52     | 21,46    | 21,46,52 |
| Q9BYN0 | 11,16       | 11,16      | 16         | 16     | 11,16    | 11,16    |
| Q9H2U1 | 47,50,52    | 47,50,52   | 47,50      | 47,50  | 47,50    | 47,50    |
| Q9P258 | 26,28       | -          | 28         | 28     | 26,28    | 26,28    |
| Q9BST9 | 9,14        | 14         | -          | -      | 9,14     | -        |
| Q96FS4 | 13,47       | 13,47      | 13,47      | -      | -        | 13       |
| P05423 | 95,97,99    | 95,97,99   | 95,97      | 97     | 95,97,99 | 95,97    |
| Q9UPN9 | 577,598,604 | 577,604    | -          | -      | 577,598  | -        |
| Q96CU9 | 12          | 12         | 12         | 12     | 12       | -        |
| P52272 | 60,456      | -          | -          | -      | 60,456   | -        |
| Q8WUM0 | 17,54,61    | 17,61      | 17,61      | 17     | 17,61    | 17       |
| Q9H6A9 | 274,702     | 274        | 274        | -      | 274,     | 274      |
| Q96PU8 | 227,242     | -          | -          | -      | 227      | 242      |
| Q13454 | 63,67       | 67         | -          | -      | 67       | -        |

**Table S2.** Comparison of the predictive result in different methyllysine predictors with a testing data set.

| Accession | Experimental methyllysine sites | Predicted sites in different methyllysine predictors |      |          |      |       |       |                |
|-----------|---------------------------------|------------------------------------------------------|------|----------|------|-------|-------|----------------|
|           |                                 | MeMo                                                 | MASA | BPB-PPMS | PMes | PLMLA | MethK | iMethyl-PseAAC |
| D3ZAZ5    | 334                             | -                                                    | -    | -        | -    | -     | -     | -              |
| A7E2C5    | 174                             | -                                                    | -    | -        | -    | 174   | -     | -              |
| Q70E73    | 134                             | -                                                    | -    | -        | -    | 134   | 134   | -              |
| Q6R327    | 1367                            | -                                                    | -    | -        | -    | 1367  | -     | 1367           |
| Q9UEE9    | 219                             | -                                                    | 219  | -        | -    | -     | -     | -              |
| O00515    | 367                             | -                                                    | -    | -        | -    | 367   | -     | 367            |
| Q66K74    | 553                             | -                                                    | -    | -        | -    | 553   | -     | -              |
| Q15942    | 295                             | -                                                    | -    | -        | -    | -     | -     | 295            |
| Q9NQS1    | 230                             | -                                                    | -    | -        | -    | 230   | 230   | 230            |
| P14625    | 663                             | -                                                    | -    | -        | -    | -     | -     | -              |
| Q8N163    | 123                             | -                                                    | -    | -        | -    | 123   | -     | 123            |
| Q96JP5    | 174                             | -                                                    | -    | -        | -    | 174   | -     | 174            |
| Q9NVM6    | 264                             | -                                                    | -    | -        | -    | 264   | -     | -              |
| P08238    | 607                             | -                                                    | -    | -        | -    | 607   | 607   | -              |
| P34932    | 773                             | -                                                    | -    | 773      | -    | 773   | -     | -              |
| P11021    | 591                             | -                                                    | -    | -        | -    | -     | 591   | -              |
| P11142    | 557                             | -                                                    | -    | -        | -    | 557   | 557   | -              |
| P50238    | 64                              | -                                                    | -    | 64       | -    | 64    | -     | -              |
| P08107    | 567                             | -                                                    | -    | 567      | -    | -     | -     | -              |
| O60870    | 135                             | -                                                    | -    | -        | -    | 135   | 135   | 135            |

|        |           |     |   |     |     |           |           |      |
|--------|-----------|-----|---|-----|-----|-----------|-----------|------|
| Q9P270 | 553       | -   | - | -   | -   | -         | -         | 553  |
| Q9Y657 | 7         | -   | - | -   | -   | -         | -         | 7    |
| Q01518 | 287       | -   | - | -   | -   | 287       | 287       | 287  |
| Q15417 | 158       | -   | - | -   | -   | 158       | -         | -    |
| Q14847 | 75        | -   | - | -   | -   | -         | 75        | -    |
| P27816 | 809,1011  | -   | - | -   | -   | 809       | -         | -    |
| P16949 | 29        | -   | - | -   | -   | 29        | -         | -    |
| Q9BX63 | 575       | -   | - | -   | -   | 575       | -         | -    |
| Q86XP3 | 708       | -   | - | -   | -   | 708       | -         | 708  |
| Q9H9B1 | 153       | -   | - | -   | -   | 153       | 153       | 153  |
| Q96KQ7 | 189       | -   | - | -   | -   | -         | -         | 189  |
| Q9H9T3 | 229       | -   | - | -   | -   | 229       | -         | -    |
| Q92800 | 736       | -   | - | 736 | -   | 736       | -         | -    |
| Q15910 | 510       | -   | - | -   | -   | 510       | 510       | -    |
| O94761 | 114       | -   | - | -   | -   | -         | 114       | -    |
| Q15047 | 1170,1178 | -   | - | -   | -   | 1170,1178 | 1170,1178 | -    |
| Q93075 | 56        | -   | - | -   | -   | 56        | -         | -    |
| P60174 | 231       | -   | - | -   | 231 | 231       | 231       | -    |
| Q9Y2L1 | 331       | -   | - | -   | -   | 331       | -         | -    |
| Q96N67 | 381       | -   | - | -   | -   | -         | -         | -    |
| Q7Z699 | 224       | 224 | - | -   | -   | -         | -         | -    |
| A1X283 | 619       | -   | - | -   | -   | -         | -         | -    |
| Q9NPJ3 | 111       | -   | - | -   | -   | -         | -         | -    |
| P04075 | 330       | -   | - | -   | -   | -         | -         | -    |
| P38117 | 202       | -   | - | -   | -   | -         | 202       | -    |
| Q9Y512 | 255       | -   | - | -   | -   | -         | 255       | 255  |
| O43929 | 7         | -   | - | -   | -   | 7         | -         | 7    |
| O95248 | 1222      | -   | - | -   | -   | 1222      | 1222      | 1222 |
| C9JFZ1 | 565       | -   | - | -   | -   | -         | -         | 565  |
| P30101 | 61        | -   | - | -   | -   | 61        | -         | -    |
